1 **Full title:** SARS-CoV-2 infection induces mixed M1/M2 phenotype in circulating  
2 monocytes and alterations in both dendritic cell and monocyte subsets

3 **Short title:** SARS-CoV-2 infection and innate immunity

4  
5 Matic Sanja<sup>1</sup>, Popovic Suzana<sup>2\*</sup>, Djurdjevic Predrag<sup>3,11</sup>, Todorovic Danijela<sup>4</sup>, Djordjevic Natasa<sup>5</sup>,  
6 Mijailovic Zeljko<sup>6,12</sup>, Sazdanovic Predrag<sup>7,13</sup>, Milovanovic Dragan<sup>5,14</sup>, Ruzic Zecevic Dejana<sup>5,14</sup>,  
7 Petrovic Marina<sup>3,15</sup>, Sazdanovic Maja<sup>8</sup>, Zornic Nenad<sup>9,16</sup>, Vukicevic Vladimir<sup>16</sup>, Petrovic Ivana<sup>17</sup>,  
8 Matic Snezana<sup>17</sup>, Karic Vukicevic Marina<sup>18</sup>, Baskic Dejan<sup>2,19</sup>

9  
10 <sup>1</sup>Department of Pharmacy, Faculty of Medical Sciences, University of Kragujevac, Serbia

11 <sup>2</sup>Centre for Molecular Medicine and Stem Cell Research, Faculty of Medical Sciences,  
12 University of Kragujevac, Serbia

13 <sup>3</sup>Department of Internal Medicine, Faculty of Medical Sciences, University of Kragujevac,  
14 Serbia

15 <sup>4</sup>Department of Genetics, Faculty of Medical Sciences, University of Kragujevac, Serbia

16 <sup>5</sup>Department of Pharmacology and Toxicology, Faculty of Medical Sciences, University of  
17 Kragujevac, Serbia

18 <sup>6</sup>Department of Infectious Diseases, Faculty of Medical Sciences, University of Kragujevac,  
19 Serbia

20 <sup>7</sup>Department of Anatomy, Faculty of Medical Sciences, University of Kragujevac, Serbia

21 <sup>8</sup>Department of Histology and Embryology, Faculty of Medical Sciences, University of  
22 Kragujevac, Serbia

23 <sup>9</sup>Department of Surgery, Faculty of Medical Sciences, University of Kragujevac, Serbia

- 24 <sup>11</sup>Clinic for Haematology, Clinical Centre Kragujevac, Serbia
- 25 <sup>12</sup>Department of Infectious Diseases, Clinical Centre Kragujevac, Serbia
- 26 <sup>13</sup>Gynecology and Obstetrics Clinic, Clinical Centre Kragujevac, Serbia
- 27 <sup>14</sup>Department of Clinical Pharmacology, Clinical Centre Kragujevac, Serbia
- 28 <sup>15</sup>Clinic for Pulmonology, Clinical Centre Kragujevac, Serbia
- 29 <sup>16</sup>Corona Centre, Clinical Centre Kragujevac, Serbia
- 30 <sup>17</sup>Department of Microbiology, Clinical Centre Kragujevac, Serbia
- 31 <sup>18</sup>Department of Rheumatology, Allergology and Clinical Immunology, Clinical Centre  
32 Kragujevac, Serbia
- 33 <sup>19</sup>Public Health Institute, Kragujevac, Serbia
- 34
- 35
- 36 \* Corresponding author:
- 37 E-mail: [suzana.popovic@medf.kg.ac.rs](mailto:suzana.popovic@medf.kg.ac.rs) (PS)

## 39 **Abstract**

40 Clinical manifestations of SARS-CoV-2 infection range from mild to critically severe.  
41 The aim of the study was to highlight the immunological events associated with the severity of  
42 SARS-CoV-2 infection, with an emphasis on cells of innate immunity. Thirty COVID-19  
43 patients with mild/moderate symptoms and 27 patients with severe/critically severe symptoms  
44 were recruited from the Clinical Center of Kragujevac during April 2020. Flow cytometric  
45 analysis was performed to reveal phenotypic and functional alterations of peripheral blood cells  
46 and to correlate them with the severity of the disease. In severe cases, the number of T and B  
47 lymphocytes, dendritic cells, NK cells, and HLA-DR-expressing cells was drastically decreased.  
48 In the monocyte population proportion between certain subsets was disturbed and cells  
49 coexpressing markers of M1 and M2 monocytes were found in intermediate and non-classical  
50 subsets. In mild cases decline in lymphocyte number was less pronounced and innate immunity  
51 was preserved as indicated by an increased number of myeloid and activated dendritic cells, NK  
52 cells that expressed activation marker at the same level as in control and by low expression of  
53 M2 marker in monocyte population. In patients with severe disease, both innate and adoptive  
54 immunity are devastated, while in patients with mild symptoms decline in lymphocyte number is  
55 lesser, and the innate immunity is preserved.

56

57 **Keywords:** SARS-CoV-2; COVID-19; immune response; severity of disease; monocytes; NK  
58 cells; dendritic cells

59

## 60 **Introduction**

61 Severe acute respiratory syndrome coronavirus 2 (SARS-CoV-2) continues to infect millions of  
62 people worldwide, causing coronavirus disease (COVID-19). The severity of reported symptoms  
63 for COVID-19 ranges from mild to critically severe having significant potential for fatal  
64 outcome. Previous studies have revealed a certain pattern of changes in biochemical and  
65 hematological parameters, while researches on immunopathology underlying COVID-19 are in  
66 progress. Currently, there is no wide agreement of the scientific and medical community about  
67 diagnostic, treatment and prognostic importance of immunological parameters for routine  
68 practice [1-3].

69 In COVID-19 patients inflammatory factors such as C – reactive protein (CRP) and  
70 erythrocyte sedimentation rate (ESR) are generally elevated, and CRP level, in general,  
71 positively correlates with the severity of the infection. High procalcitonin (PCT) level is a highly  
72 specific marker of the presence of bacterial infection and elevated levels of aspartate  
73 aminotransferase (AST), alanine aminotransferase (ALT), lactate dehydrogenase (LDH), creatine  
74 kinase (CK), D-dimmer and prothrombin time were proposed to be markers of severe disease [4].  
75 The majority of studies conducted so far found that interleukin-6 (IL-6) serum concentrations  
76 positively correlate with exacerbation of disease after 7-14 days of onset of symptoms [5]. Other  
77 studies indicate that an increased number of neutrophils in combination with lymphopenia and  
78 consequent increase in neutrophil-to-lymphocyte ratio was the prognostic factor for severe cases  
79 [6]. The results of the first research on lymphocyte populations' change in severe COVID-19  
80 cases indicated a decreased number of T lymphocytes, an increased number of naive T helper  
81 cells, and a decrease in memory T helper cells (1). Also, the number of CD8+T cells, B cells, and  
82 natural killer (NK) cells were substantially reduced in COVID-19 patients, particularly in severe

83 cases [5-7]. In COVID-19 patients with severe pulmonary inflammation expression of NKG2  
84 marker on NK cells and cytotoxic T lymphocytes were markedly increased and tend to correlate  
85 with functional impairment, indicating disease progression [8]. Although neutrophilia and  
86 impairment of lymphocyte number and function in COVID-19 patients have been well described,  
87 fewer data are available on dendritic cells and monocytes [9]. Two groups of authors separately  
88 pointed to alterations in the activation status and morphology of monocytes in severe cases. They  
89 identified forward scatter high (FCS-high) [10] and side scatter high (SSC-high) [11] populations  
90 of monocytes that secrete IL-6, IL-10 and TNF- $\alpha$ . One paper described the depletion of  
91 plasmacytoid dendritic cells in patients with severe disease [12].

92 Detailed analysis of immune parameters in COVID-19 patients and a better  
93 understanding of features of immune response underlying distinctive courses of the disease will  
94 improve diagnostics, the prognosis of disease outcome, as well as treatment strategies. Here, we  
95 present novel observations about changes in morphology and activation status of the cells of the  
96 innate immunity in COVID-19 patients, which seem to correlate with the severity of the  
97 infection.

98

99

## 101 **Patients and methods**

### 102 **Patients/ Study design and participants**

103 Fifty-seven cases of COVID-19 patients who were hospitalized in the Clinical Center of  
104 Kragujevac were recruited in this study during April 2020. Inclusion criteria were: adults of male  
105 or female gender ( $\geq 18$  years old), SARS-CoV-2 infection confirmed by real-time polymerase  
106 chain reaction (RT-PCR) and hospitalization. COVID-19 patients were diagnosed according to  
107 the World Health Organization's (WHO) interim guidance [13]. Clinical condition severity was  
108 classified in four categories: a) mild; mild clinical symptoms of upper respiratory tract viral  
109 infection; b) moderate: present signs of pneumonia without need for supplemental oxygen; c)  
110 severe: fever or suspected respiratory infection with compromised respiratory function; and d)  
111 critically severe: worsening of respiratory symptoms with the necessity for mechanical  
112 ventilation. Our cohort of 57 COVID-19 patients consisted of 30 cases of mild/moderate disease  
113 (MD) and 27 cases of severe/critical disease (SD). Five healthy subjects with a negative RT-PCR  
114 test for coronavirus were included in the study as a control group. Ethics Committee of Clinical  
115 Center Kragujevac approved this study (Nr 01/20-405) and prior initiation written informed  
116 consent was obtained from every subject or the patients' legal representative if he or she was  
117 unable to communicate e.g. sedated on mechanical ventilation, according to the Declaration of  
118 Helsinki of the World Medical Association.

119

### 120 **Data collection**

121 The patients' data were obtained from hospital medical records (electronic and paper version) for  
122 each study subject according to the modified case record rapid recommendation concerning the

123 patients with Covid-19 infection of WHO (Global COVID-19 Clinical Platform: novel  
124 coronavirus (Covid-19) - rapid version. Geneva: World Health Organization, 2020.  
125 (<https://apps.who.int/iris/rest/bitstreams/1274888/retrieve>). The data for the following variables  
126 were collected: age, sex, medical history, symptoms, and signs of Covid-19, severity assessment,  
127 radiological imaging, and laboratory findings. Blood samples for laboratory tests and flow  
128 cytometry analysis were collected at admission, i.e. before any treatment. The following  
129 hematological parameters were examined: white blood cell count (WBC) with WBC differential  
130 count (neutrophils, eosinophils, basophils, lymphocytes, and monocytes), red cell blood count  
131 (RBC), hemoglobin concentration and platelet count (PLT). The measured biochemical  
132 parameters included creatinine (CRE), blood urea nitrogen (3), glycemia (GLY), albumin (ALB),  
133 aspartate aminotransferase (AST), alanine aminotransferase (ALT), lactate dehydrogenase  
134 (LDH), creatine kinase (CK), D-dimmer, C-reactive protein (CRP) and procalcitonin (PCT).  
135 Analysis of hematological parameters and blood biochemical assays were performed with  
136 commercial reagents and according to good laboratory practices at the hematology and clinical  
137 biochemistry departments of the hospital.

138

## 139 **Flow cytometry**

140 Whole blood samples with anticoagulant from 5 healthy subjects, 10 patients with mild and 10  
141 patients with severe disease were stained with anti-HLA-DR PE and ECD, anti-CD3 ECD, anti-  
142 CD4 PE, anti-CD8 FITC, anti-CD19 PC7, anti-CD14 FITC, anti-CD16 PC5, anti-CD15 PE, anti-  
143 CD57 FITC, anti-CD56 PE, anti-CD11c PCP, anti-CD123 PE, anti-CD83 PE, anti-CD38 PE,  
144 anti-CD23 ECD and isotype controls (all from Beckman Coulter) for 20 minutes in the dark at

145 +4°C. Samples were analyzed on the flow cytometer Cytomics FC500 (Beckman Coulter). Data  
146 were processed by FlowJo V.10.

147

## 148 **Statistical analysis**

149 Descriptive analysis of collected data and hypothesis testing of observed differences in measured  
150 variables were used. Shapiro-Wilk test was employed for the evaluation of normality data  
151 distribution. Independent groups t-test and analysis of variance (ANOVA) were used for  
152 comparison between groups. Two-sided *p*-values of less than 0.05 were considered statistically  
153 significant. Commercial statistical program SPSS (version 19.0, SPSS Inc., Chicago, IL) was  
154 used for data analysis.

155



## 157 **Results**

### 158 **Baseline Characteristics of COVID-19 Patients**

159 The median age of patients was 58 years and 35 patients were male (Table 1). Fever (75.4%),  
160 cough (70.2%), and fatigue (33.3%) were the most common symptoms upon admission.  
161 According to physical examination, 57.9% of patients had diminished breath sound and 42.1%  
162 had crackles. Radiological findings (standard chest X-ray) showed individual pneumonic foci in  
163 50.9% of patients and interstitial changes in 36.8% ones. Hematological parameters and  
164 biochemical analysis of the whole patient cohort showed that increased granulocytes, glycemia,  
165 ALT, LDH, CK, D-dimmer, and CRP were the most typical findings, while oxygen saturation  
166 and blood pH were under normal values in the majority of patients (S1 Table). The values of  
167 laboratory parameters were significantly different among MD and SD cases (Table 2). WBC,  
168 granulocyte percent, LDH, CK, CRP, PCT, pCO<sub>2</sub> were higher in SD patients, while the  
169 lymphocyte and monocyte counts, albumin levels, oxygen saturation, and potassium  
170 concentrations were lower among SD patients compared to MD ones.

171

172 **Table 1.** Clinical characteristics of COVID-19 patients

| <i>Characteristic</i>        | <i>Patients</i> |
|------------------------------|-----------------|
| <b>Age, median (min-max)</b> | 58 (23-88)      |
| <b>Gender</b>                |                 |
| <b>Male, n (%)</b>           | 35 (61.4)       |
| <b>Female, n (%)</b>         | 22 (38.6)       |
| <b>Severity of disease</b>   |                 |

|                                            |           |
|--------------------------------------------|-----------|
| <b>Mild/moderate, n (%)</b>                | 34 (59.6) |
| <b>Severe/critically ill, n (%)</b>        | 23 (40.4) |
| <b>Symptoms</b>                            |           |
| <b>Fever, n (%)</b>                        | 43 (75.4) |
| <b>Cough, n (%)</b>                        | 40 (70.2) |
| <b>Shortness of breath, n (%)</b>          | 13 (22.8) |
| <b>Chest pain, n (%)</b>                   | 7 (12.3)  |
| <b>Myalgia, n (%)</b>                      | 3 (5.3)   |
| <b>Headache, n (%)</b>                     | 6 (10.5)  |
| <b>Weakness, n (%)</b>                     | 19 (33.3) |
| <b>Sore throat, n (%)</b>                  | 7 (12.3)  |
| <b>Loss of smell, n (%)</b>                | 2 (3.5)   |
| <b>Gastrointestinal symptoms, n (%)</b>    | 9 (15.8)  |
| <b>Physical examination</b>                |           |
| <b>Normal breath sound, n (%)</b>          | 9 (15.8)  |
| <b>Diminished breath sound, n (%)</b>      | 33 (57.9) |
| <b>High – pitched breath sounds, n (%)</b> | 3 (5.3)   |
| <b>Crackles, n (%)</b>                     | 24 (42.1) |
| <b>Wheezing, n (%)</b>                     | 4 (7.0)   |
| <b>Chest X-ray</b>                         |           |
| <b>Without active lesions, n (%)</b>       | 9 (15.8)  |
| <b>Prominent bronchovascular</b>           | 3 (5.3)   |

|                                         |           |
|-----------------------------------------|-----------|
| <b>markings, n(%)</b>                   |           |
| <b>Interstitial changes, n (%)</b>      | 21 (36.8) |
| <b>Individual pneumonic foci, n (%)</b> | 29 (50.9) |
| <b>Diffuse pneumonic foci, n (%)</b>    | 16 (28.1) |
| <b>Ground-glass opacities, n (%)</b>    | 1(1.8)    |
| <b>Homogenous opacities, n (%)</b>      | 2(3.5)    |

173

174

175 **Table 2.** Haematological and serum biochemistry parameters in COVID-19 patients with mild  
 176 and severe disease

| <i>Parameters</i>              | <i>Mild</i>   | <i>Severe</i> | <i>p</i> |
|--------------------------------|---------------|---------------|----------|
| <b>WBC (x10<sup>9</sup>/L)</b> | 5.4 ± 1.7     | 9.7 ± 4.9     | <0.0001  |
| <b>Granulocytes (%)</b>        | 67.2 ± 9.4    | 82.4 ± 8.6    | <0.0001  |
| <b>Lymphocytes (%)</b>         | 21.1 ± 6.7    | 9.3 ± 6.6     | <0.0001  |
| <b>Monocytes (%)</b>           | 10.5 ± 3.5    | 6.7 ± 3.3     | <0.0001  |
| <b>AST(IU/L)</b>               | 32.3±15.0     | 54.7±31.2     | 0.017    |
| <b>Albumins (g/L)</b>          | 36.6 ± 4.3    | 29.6 ± 6.4    | <0.0001  |
| <b>LDH (U/L)</b>               | 450.8 ± 99.5  | 919.2 ± 282.4 | <0.0001  |
| <b>CK (U/L)</b>                | 124.7 ± 132.0 | 210.8 ± 144.6 | 0.035    |
| <b>CRP (mg/L)</b>              | 36.3 ± 41.5   | 119.3 ± 80.9  | <0.0001  |
| <b>PCT (ng/mL)</b>             | 0.1 ± 0.1     | 0.3 ± 0.3     | 0.001    |
| <b>pCO<sub>2</sub> (kPa)</b>   | 4.7 ± 0.6     | 6.0 ± 3.1     | 0.048    |

|                       |            |            |         |
|-----------------------|------------|------------|---------|
| <b>Saturation (%)</b> | 96.1 ± 2.4 | 89.1 ± 6.7 | <0.0001 |
| <b>K(mmol/L)</b>      | 4.4 ± 0.5  | 3.9 ± 0.6  | 0.003   |

177 The numbers represent the means ± standard deviations

178

179 **Changes in the frequency of peripheral blood cells in COVID-19**  
 180 **patients**

181 Both mild and severe cases had a higher percent of polymorphonuclear, but lower percentage  
 182 ratio of mononuclear cells in comparison to healthy controls, and that difference was more  
 183 profound in severe cases (Table 3.).

184

185 **Table 3.** The percentage ratio of peripheral blood leukocytes (PBL) in healthy subjects, patients  
 186 with mild disease, and patients with severe disease, as shown by flow cytometric analysis.

| <b><i>PBL ratio</i></b> | <b><i>control</i></b> |                     | <b><i>mild</i></b>   |                     | <b><i>severe</i></b> |                     | <b><i>p</i></b> |
|-------------------------|-----------------------|---------------------|----------------------|---------------------|----------------------|---------------------|-----------------|
|                         | <b><i>median</i></b>  | <b><i>range</i></b> | <b><i>median</i></b> | <b><i>range</i></b> | <b><i>median</i></b> | <b><i>range</i></b> |                 |
| <b>Ne/Ly</b>            | <b>1.2</b>            | 1.0-3.2             | <b>1.7</b>           | 1.5-2.9             | <b>17.4</b>          | 9.0-23.1            | <0.0001         |
| <b>CD15+</b>            | <b>49.4</b>           | 37.9-57.4           | <b>58.2</b>          | 42.1-64.3           | <b>90.1</b>          | 83.1-93.4           | <0.0001         |
| <b>CD3+</b>             | <b>24.4</b>           | 4.4-30.0            | <b>15.6</b>          | 8.3-32.3            | <b>1.2</b>           | 0.6-3.9             | <0.0001         |
| <b>CD3+CD4+</b>         | <b>14.1</b>           | 11.7-19.2           | <b>9.1</b>           | 4.9-11.1            | <b>0.8</b>           | 0.0-2.4             | <0.0001         |
| <b>CD3+CD8+</b>         | <b>5.8</b>            | 4.9-9.7             | <b>2.5</b>           | 0.7-3.1             | <b>0.1</b>           | 0.1-1.4             | <0.0001         |
| <b>CD4+/CD8+</b>        | <b>2.0</b>            | 1.5-3.9             | <b>4.2</b>           | 1.9-13.1            | <b>6.5</b>           | 0.1-19.6            | 0.54            |
| <b>CD19+</b>            | <b>8.2</b>            | 3.4-12.4            | <b>5.2</b>           | 2.2-17.0            | <b>2.1</b>           | 1.6-3.7             | 0.0032          |
| <b>CD3-CD56+</b>        | <b>4.2</b>            | 4.1-10.3            | <b>6.3</b>           | 3.1-8.5             | <b>1.8</b>           | 1.1-2.5             | 0.016           |

|              |            |          |            |          |            |          |       |
|--------------|------------|----------|------------|----------|------------|----------|-------|
| <b>CD14+</b> | <b>8.7</b> | 4.9-11.4 | <b>7.7</b> | 5.8-11.0 | <b>5.3</b> | 2.3-11.5 | 0.042 |
|--------------|------------|----------|------------|----------|------------|----------|-------|

187

188           Although in non-severe patients all parameters were close to, or in the normal range,  
189 percent of CD15+ cells (neutrophils) was higher than in controls, and proportions of B  
190 lymphocytes (CD19+), monocytes (CD14+) and both helper (CD3+CD4+) and cytotoxic  
191 (CD3+CD8+) T lymphocytes were lower. In patients with severe disease very high neutrophil-  
192 to-lymphocyte ratio (17.4) reflected an increase in neutrophil count (90.1%), diminution in B  
193 lymphocyte (2.1%) and NK cells count (1.8%), and marked decline of T lymphocyte percentage  
194 (1.2%). Very low percent, far below the lower limit of the normal range, was found for both  
195 helper (0.8%) and cytotoxic (0.1%) T cells. CD4/CD8 ratio was three times higher in severe  
196 patients than in controls (S1 Fig), but without statistical significance. The percentage of  
197 monocytes/macrophages was in the normal range in both mild and severe cases, although lower  
198 than in control.

199           The NK cell subpopulation (CD3-CD56+) was assessed for the expression of CD57, a  
200 marker of NK cell maturation and activation. The change in NK cell number was statistically  
201 significant among the groups ( $p=0.016$ ). In relation to control, mild cases had a higher number  
202 of NK cells (6.3% vs. 4.2% in controls), but about the same percent of CD57+ cells (1.1% in  
203 mild cases; 1.2% in controls), while in severe cases both total number of NK cells and percent of  
204 activated cells were lower (1.8% and 0.5%, respectively) (Fig 1), even though statistical  
205 significance was not reached.

206 **Fig 1. Flow cytometry analysis of NK cells in the whole blood of COVID-19 patients. (A-C)**

207 Smoothed histograms: CD3, CD56 and CD57 expression in patients with severe disease (red),  
208 mild disease (blue) and healthy control (green). (D) Overlaid histograms: Gating strategy for NK

209 cells. (E) Overlaid contour plot: Identification of CD3<sup>-</sup>CD56<sup>+</sup>CD57<sup>+</sup> cells in patients with severe  
210 disease (red), mild disease (blue) and healthy control (green). (F) Bar chart: The percentage of  
211 CD3<sup>-</sup>CD56<sup>+</sup>CD57<sup>-</sup> and CD3<sup>-</sup>CD56<sup>+</sup>CD57<sup>+</sup> cells in healthy controls and patients with mild (MD)  
212 and severe disease (SD).

213 Further analysis demonstrated that the percent of cells expressing HLA-DR was almost  
214 two times lower in mild cases than in controls (8.1% vs. 14.9%), and 6.5 times lower in severe  
215 cases (2.3%) with statistical significance of  $p < 0.0001$ . Namely, a decrease of HLA-DR  
216 expression, more pronounced in severe cases, was determined in both monocytes (5.5% -  
217 controls; 4.2% - mild cases; 1.5% - severe cases,  $p < 0.0001$ ) and B lymphocytes (2.0% - controls;  
218 1.3% - mild cases; 0.7% - severe cases,  $p = 0.014$ ) (Fig 2).

219 **Fig 2. Flow cytometry analysis of the HLA-DR, CD14 and CD19 expression in whole blood**  
220 **of COVID-19 patients.** (A-C) Smoothed histograms: HLA-DR-PE, CD14-FITC and CD19-PC5  
221 expression showing patients with severe disease (red), mild disease (blue) and healthy control  
222 (green). (D, E) Dot plots: Identification of HLA-DR<sup>+</sup>CD14<sup>+</sup> and HLA-DR<sup>+</sup>CD19<sup>+</sup> population  
223 with color representing patient with severe disease (red), mild disease (blue) and control (green).  
224 (F) Bar chart: The percentage of HLA-DR<sup>+</sup>, HLA-DR<sup>+</sup>CD14<sup>+</sup> and HLA-DR<sup>+</sup>CD19<sup>+</sup> expression  
225 in healthy controls and patients with mild (MD) and severe disease (SD).

226 The percentage ratio of dendritic cells (Lyn-HLADR<sup>+</sup>) didn't differ much between  
227 controls and mild cases, but in later, there was a lower number of plasmacytoid (CD123<sup>+</sup>) DCs  
228 (0.6% vs. 1.4% in control,  $p = 0.0017$ ), a higher number of myeloid (CD11c<sup>+</sup>) DCs (1.0% vs.  
229 0.2% in control,  $p = 0.0047$ ), and DCs expressing CD83, an activation marker for antigen-  
230 presenting cells (0.7% vs. 0.5% in control) (Fig 3). Contrarily, in severe cases, CD11c<sup>+</sup> DCs

231 were almost undetectable and the percent of activated and plasmacytoid DCs was lower than in  
232 mild cases and controls (0.1%).

233 **Fig 3. Flow cytometry analysis of dendritic cells in the whole blood of COVID-19 patients.**

234 (A-B) Overlaid histograms: Gating strategy for DC. (C-E) Smoothed histograms: CD11c, CD123  
235 and CD83 expression in dendritic cells (Lin<sup>-</sup>HLA-DR<sup>+</sup>) of patients with severe disease (red),  
236 mild disease (blue) and healthy control (green). (F) Bar chart: The percentage of myeloid  
237 (mDCs), plasmacytoid (pDCs) and activated dendritic cells in healthy controls and patients with  
238 mild (MD) and severe disease (SD).

239 Further, by tracking relative expression levels of CD14 and CD16 surface molecules, we  
240 examined the proportions of monocyte/macrophage subsets, classical, intermediate, and non-  
241 classical (S2 Fig.). In relation to control the percent of classical monocytes (CD14<sup>high</sup>CD16<sup>-</sup>) was  
242 higher in mild cases and even higher in severe cases with statistical significance (86.0% in  
243 control, 89.2% in mild cases and 94.8% of total monocytes in severe cases,  $p=0.0033$ ), while the  
244 percent of intermediate (CD14<sup>high</sup>CD16<sup>+</sup>) and non-classical monocytes (CD14<sup>low</sup>CD16<sup>+</sup>)  
245 decreased (Fig 4) (intermediate: 5.5% in control, 3.6% in mild and 1.9% in severe cases,  $p=0.14$ ;  
246 non-classical: 8.6% in control, 7.2% in mild and 3.3% in severe patients,  $p=0.0057$ ).

247 **Fig 4. Flow cytometry analysis of monocyte subsets.** (A-C) Zebra plots: Monocyte subsets in

248 healthy control, patients with mild (MD) and severe disease (SD). (D) Overlaid contour plot:  
249 Monocyte subsets in patients with severe disease (red), mild disease (blue) and healthy control  
250 (green). (E) Bar chart: The percentage of the classical, intermediate and non-classical monocytes  
251 in healthy controls and patients with mild (MD) and severe disease (SD).

252 Next, the polarization of monocytes was revealed using CD38 as a marker of M1  
253 monocytes, and CD23 typical of M2 monocytes. In the monocyte population of severe cases we

254 found higher percent of CD38<sup>+</sup> (98.3% vs. 94.1% in control and 93.3% in mild cases,  $p=0.039$ )  
255 and a markedly higher percent of CD23<sup>+</sup> cells (10.1% vs. 1.5% in control and 1.6% in mild  
256 cases,  $p=0.0032$ ). Of note, all monocytes positive for CD23, co-expressed CD38 as well (Fig 5).

257 **Fig 5. Flow cytometry analysis of the CD38 and CD23 expression in monocytes of COVID-**  
258 **19 patients.** (A-C) Overlaid contour plot: Identification of CD38<sup>+</sup>, CD23<sup>+</sup> and CD38<sup>+</sup>CD23<sup>+</sup>  
259 monocytes in patient with severe disease (red), mild disease (blue) and control (green). (D-F) Bar  
260 chart: The percentage of the CD38<sup>+</sup>, CD23<sup>+</sup> and CD38<sup>+</sup>CD23<sup>+</sup> monocytes in healthy controls and  
261 patients with mild (MD) and severe disease (SD).

262 Cells co-expressing CD23 and CD38 were absent in classical monocyte subset of both controls  
263 and patients, but they were present in intermediate and non-classical subsets in patients,  
264 especially in severe cases (intermediate: 5.9% - control, 21.5% - mild, 27.7% - severe cases,  
265  $p=0.17$ ; non-classical: 3.6% - control, 17.1% - mild, 48.5% - severe cases,  $p=0.0021$ ) (Fig 6).

266 **Fig 6. Flow cytometry analysis of the CD38 and CD23 expression in monocyte subsets of**  
267 **COVID-19 patients.** (A-C) Overlaid contour plot: Identification of CD38<sup>+</sup>CD23<sup>+</sup> in classical,  
268 intermediate and non-classical monocytes of the patient with severe disease (red), mild disease  
269 (blue) and control (green). (D) Bar chart: The percentage of the CD38<sup>+</sup>CD23<sup>+</sup> classical,  
270 intermediate and non-classical monocytes in healthy controls and patients with mild (MD) and  
271 severe disease (SD).

272



## 274 **Discussion**

275 COVID-19 is the third emerging coronavirus infectious disease in the 21st century. The virus  
276 was introduced from an animal reservoir and met an immunologically naive human population.  
277 A number of studies have described changes within innate and adaptive immune response in  
278 SARS-Cov-2-infected patients, but there are still many unknowns. In our study, we recorded  
279 baseline characteristics of COVID-19 patients and analyzed changes in peripheral blood cell  
280 populations in relation to control healthy subjects.

281 SARS-Cov-2 infection provokes sustained cytokine and chemokine secretion, leading to  
282 severe lung injury, multiorgan failure, immune dysfunction, and mortality. Our results are in line  
283 with previous findings showing that these alterations came under the signs of a common  
284 respiratory infection such as fever, cough, and fatigue [14] and that most patients had  
285 granulocytosis, elevated infection-related and organ-injuries-related biomarkers, including LDH,  
286 CK, ALT, which were higher among severe cases. Also, we found elevated levels of D-dimmer  
287 and CRP, parameters that have been reported to be associated with the severity of disease [4].  
288 The cytokine storm is thought to be responsible for multiorgan damage and elevated organ-  
289 injuries-related biomarkers. However, correlation analysis between lymphocyte subsets and  
290 biochemical markers showed that most biochemical markers indicating organ damage are  
291 negatively correlated with lymphocyte counts in SARS-Cov-2 patients, which is not the case in  
292 patients with pneumonia of other etiologies. This finding highlights that the potential cause of  
293 multi-organ injury is the virus itself [15].

294 The common findings of previous research were high percent of neutrophils,  
295 lymphopenia, and high neutrophil-to-lymphocyte ratio in COVID-19 patients in comparison to  
296 healthy subjects, whereas this difference was more radical in severe disease cases, which is in

297 consent with our results [6, 16-19]. Lymphopenia is one of the most salient markers of COVID-  
298 19 and it seems to arise as the result of the reduction of all lymphocyte populations, including  
299 CD4+ and CD8+ T cells, B cells, and NK cells. In line with our results, Zhou et al. [18] have  
300 described that the decline in CD4+ T lymphocyte count is significant in both severe and mild  
301 patients, while the decrease of CD+ 8 cells was more profound in severe patients. Still, there is a  
302 report that the reduction in CD4+ T cells is much greater in severe cases [6]. As previously  
303 described, we found a greater decrease in CD8+ than in CD4+ subpopulation, and the decrease in  
304 B cell percentage, that was more expressed in severe cases. It's noteworthy that the decline in the  
305 frequency of all lymphocyte populations is more profound in COVID-19 patients in comparison  
306 with non-SARS-Cov-2-pneumonia patients [15]. One of the possible causes of lymphopenia is  
307 the sequestration of lymphocytes in the lung tissue, at the site of infection. The autopsy showed  
308 that infiltrating cells were mostly monocytes and macrophages, with multinucleated giant cells,  
309 and a few lymphocytes, being mainly CD4+ T cells [20]. Further examination also revealed that  
310 the number of trilineage in the bone marrow and lymphocytes in the spleen and lymph nodes are  
311 all significantly reduced. These facts indicated that lymphopenia cannot be attributed only to the  
312 tissue redistribution of lymphocytes and brought to the foreground the possible direct effect of  
313 the virus on immune cells. MERS-CoV is known to directly infect human T lymphocytes and  
314 activate the extrinsic or intrinsic apoptotic pathway, but does not replicate. Although ACE2 is  
315 not expressed on lymphocytes, as the main site of SARS-Cov-2 binding, recent research has  
316 reported a novel invading route of SARS-Cov-2. Namely, it has been noted that SARS-Cov-2  
317 can infect lymphocytes through spike protein (SP) interaction with lymphocyte's CD147 protein,  
318 highly expressed on activated T and B cells, but also on dendritic cells, monocytes and  
319 macrophages [21-22]. Whether virus induces direct cytopathic effects is not yet elucidated.

320 NK cells, as a member of innate immunity, provide crucial early defense against viral  
321 infections. Contrarily to other reports [7, 8, 16], our results showed that in mild COVID-19  
322 patients the percentage of total NK cells was higher in comparison to control, and the percent of  
323 activated cells was preserved, but in severe cases, both values were remarkably decreased. It has  
324 been described that type I IFN is required for NK cell activation [23]. Low percent of dendritic  
325 cells in severe patients, as described, may contribute to decreased secretion of type 1 IFN,  
326 resulting in a decline of NK cell activation. Further, the overproduction of IL-6 plays a role in  
327 the reduced activity of NK cells in mimicked viral infection *in vivo* [24]. Recent findings state  
328 that IL-6 level is high in severe COVID-19 patients, remaining low in mild cases [5], and  
329 negatively correlates with NK cell count and activity [7]. Moreover, some authors noted  
330 upregulated expression of the inhibitory receptor NKG2A on NK cells in the early stage of  
331 COVID-19 [8].

332 Abnormalities in cells that bridge innate and adaptive immunity, and regulate the latter  
333 may be responsible for the reduction of lymphocyte number and function. Key roles in immune  
334 response regulation and antigen presentation play dendritic cells (DCs). A number of ways in  
335 which viruses affect the adequate response of DCs have been described [25]. In our study, we  
336 found that the percentage of overall DCs, as well as the percent of myeloid and activated DCs,  
337 was higher in mild cases in relation to control, indicating their preserved antigen-presenting  
338 function. Also, Cao et al. [26] have demonstrated that in Influenza virus-induced differentiation  
339 of monocytes into mDCs, those cells, unlike classic mDCs, secrete chemoattractants for  
340 monocytes and type I IFN. Contrarily, in severe cases, the percent of total DCs and analyzed  
341 subpopulations was lower. Functional activation analysis of DCs in SARS-CoV infection were  
342 inconclusive showing both activation [27], and the absence of activation [28]. The consequence

343 of low degree dendritic cell activation is the insufficiency of costimulatory molecules, necessary  
344 for survival during TCR engagement, which partly explains the reduction of T lymphocytes  
345 dying by apoptosis in the absence of adequate signaling. Reduced percentage of plasmacytoid  
346 dendritic cells that we found in both mild and severe patients, suggests that the adequate  
347 response to viral infection was profoundly disrupted, considering that plasmacytoid DCs  
348 represent the main source of type I IFN. A similar effect was observed in SARS-CoV infection,  
349 where DCs failed to trigger a strong type I IFN response, implicating that the virus circumvents  
350 the activation of the innate immune system [29]. SARS-CoV also promoted a moderate increase  
351 in the production of IL-6 in DCs [30].

352 The expression of HLA-DR molecules is restricted to the cells with a specialized role in  
353 antigen presentation. Therefore, the extent of HLA-DR expression on monocytes and B cells  
354 indicates their ability for antigen-presentation. In our study overall expression of HLA-DR  
355 molecule on peripheral blood mononuclear cells was extremely downregulated among both mild  
356 and severe COVID-19 patients. The decline in monocyte HLA-DR expression in SARS-CoV-2  
357 infection has been described in recent studies [11, 19], pursuant to our results. It should be  
358 underlined that we also found reduced HLA-DR expression on B lymphocytes. Of note, in our  
359 cohort HLA-DR expression was even 6.5 times lower in severe patients. Suppression of HLA-  
360 DR expression on monocytes below the threshold value (<30% HLA-DR + monocytes) has been  
361 accepted as a definition of immunoparalysis that occurs in lethal conditions such as sepsis and  
362 represents a predisposition for superinfection with a variety of pathogens [31]. Giamarellos-  
363 Bourboulis et al. [19] proposed that one of the drivers of decreases in HLA-DR expression is IL-  
364 6 concentration, based on finding that IL-6 concentration is reciprocal to HLA-DR expression.

365           The percentage ratio of monocytes in COVID-19 patients was in the normal range, but  
366 flow cytometric analysis showed that they are different from those in healthy subjects. Although  
367 we didn't find FSC-high and SSC-high monocyte population described by some authors [10, 11],  
368 we revealed that the proportion between certain subsets of monocytes was disturbed in patients  
369 in comparison to controls. In mild cases classical (CD14<sup>high</sup>CD16<sup>-</sup>) monocytes were presented in  
370 higher percent, whereas the ratio of intermediate (CD14<sup>high</sup>CD16<sup>+</sup>) and non-classical  
371 (CD14<sup>low</sup>CD16<sup>+</sup>) decreased. This difference was more pronounced in severe cases. In the  
372 peripheral blood of healthy humans, classical monocytes are the major population of monocytes  
373 (80-95%) [32]. The main function of these so-called „inflammatory" monocytes is phagocytosis  
374 and secretion of proinflammatory cytokines. Besides, they are the primary source of monocyte-  
375 derived DCs and tissue macrophages. Intermediate monocytes (2-8%), which also have  
376 inflammatory properties, are the main ROS producers and have the highest expression of MHC  
377 II class molecules (HLA-DR), acting as specialized antigen-presenting cells. Non-classical  
378 monocytes (2-11%) are "patrolling" monocytes that travel across blood vessels to scavenge dead  
379 cells and pathogens. In contact with infectious agents, they produce inflammatory cytokines and  
380 chemokines that recruit neutrophils, and subsequently clear resulting debris and promote healing  
381 and tissue repair. During inflammation, non-classical monocytes can extravasate to inflamed  
382 tissue and differentiate to inflammatory macrophages. The three monocyte subsets have distinct  
383 roles in response to different stimuli, i.e. during homeostasis, inflammation, and tissue repair. In  
384 infectious diseases, the ratio of monocyte subsets varies depending on the pathogen, but an  
385 augmentation of CD16<sup>+</sup> monocytes was found in the majority of cases. Prominent increase of  
386 CD16<sup>+</sup> monocytes was determined in patients with bacterial infections and bacterial sepsis [33].  
387 An increase in the percent of non-classical monocytes was observed during HIV [34], Hepatitis

388 C [35], and Dengue virus infections [36]. As well, an increase in CD16+ monocytes was reported  
389 in COVID-19 patients by Zhang and Zhou [10, 18], while Hussman described raise in the  
390 intermediate subset in patients with severe pulmonary complications [37]. In contrast to these  
391 reports, we found an augmentation of classical (CD16-) subset and concomitant diminution of  
392 CD16+ subsets in COVID-19 patients. This may be a result of the migration of non-classical  
393 monocytes into the lungs where they differentiate and become inflammatory macrophages.

394 To further define functional changes in monocyte subsets during infection, we observed  
395 the expression of surface molecules CD38 and CD23. Our results showed a high expression of  
396 both CD38 and CD23 on monocytes in patients with severe disease. Importantly, in COVID-19  
397 patients monocytes co-expressing CD23 and CD38 were found in intermediate and nonclassical  
398 subsets. Mixed M1/M2 phenotype has been described in chronic infections, autoimmune  
399 diseases, cancer, and disorders associated with fibrosis (38). It is postulated that these monocytes  
400 have both proinflammatory and tissue repair functions. A decrease in the number of nonclassical  
401 monocytes in COVID-19 patients can be explained by their extravasation to lungs, where  
402 M1/M2 cells promote both inflammation and fibrosis as a tissue repair mechanism. Pulmonary  
403 fibrosis, a characteristic of acute respiratory distress syndrome (ARDS), is a complication of  
404 COVID-19 and can also be a cause of mortality in COVID-19 patients [39]. Considering the  
405 central role that monocytes play in the pathogenesis of cytokines storm in lung damage of  
406 COVID-19, here we present both conformation of some already available evidence and add some  
407 novelty about substantial phenotypical alterations of monocytes in COVID-19 patients.

408 Overall, pursuant to the previous findings and based on our results, we can speculate that  
409 SARS-CoV-2 virus causes dismantling of the immune response, but the resulting alterations  
410 differ in mild and in severe patients. In patients who didn't develop severe symptoms, a decline

411 in lymphocyte number is lesser, and the innate immunity is preserved. Despite a decrease in the  
412 percent of HLA-DR-expressing B cells and monocytes, the number of total DCs, mDCs  
413 (possibly type I IFN producing cells), and activated DCs is higher than in control, pointing to  
414 their sustained functions. NK cells, that play a key role in host defense against viral infections,  
415 are also present in higher number, and activated cells are immanent as in healthy subjects. In  
416 monocyte population expression of M2 marker CD23 is low, as in healthy controls. On the other  
417 hand, in severe cases, both arms of immune defense, innate and adoptive, are affected. The  
418 number of T and B lymphocytes is dramatically decreased, as well as the number of NK cells  
419 and DCs (both total and activated). The number of cells expressing HLA-DR is drastically lesser  
420 in severe cases, depicting the inability of antigen-presenting cells to activate T lymphocyte  
421 response. The virus affects the monocyte population as well. The percentage ratio of  
422 intermediate and nonclassical monocytes is reduced, pointing to impaired functional maturation.  
423 An increase in the percent of cells coexpressing markers of M1 and M2 monocytes points to  
424 prolongation of inflammation and evolution of fibrosis as a repair mechanism, that damages lung  
425 parenchyma and potentially increases the risk of worse clinical outcomes. Altogether, our results  
426 depict the devastation of host defense in severe patients and altered, but a more efficient immune  
427 response in patients with mild/moderate symptoms.

428

## 430 **Acknowledgments**

431 We thank the health workers of the Clinical Centre Kragujevac, doctors and especially  
432 technicians, who selflessly, in difficult moments of the struggle for the lives of patients,  
433 supported our study.



## 435 **References**

- 436 1. Lin L, Lu L, Cao W, Li T. Hypothesis for potential pathogenesis of SARS-CoV-2 infection-a  
437 review of immune changes in patients with viral pneumonia. *Emerg Microbes Infect.* 2020;  
438 9(1): 727-732. doi:10.1080/22221751.2020.1746199
- 439 2. Felsenstein S, Herbert JA, McNamara PS, Hedrich CM. COVID-19: Immunology and  
440 treatment options. *Clin Immunol.* 2020; 215: 108448. doi:10.1016/j.clim.2020.108448
- 441 3. Chen R, Sang L, Jiang M, Yang Z, Jia N, Fu W, et al. Longitudinal hematologic and  
442 immunologic variations associated with the progression of COVID-19 patients in China. *J*  
443 *Allergy Clin Immunol.* 2020; S0091-6749(20)30638-2. doi:10.1016/j.jaci.2020.05.003
- 444 4. Ying-Hui J, Lin CA, Zhen-Shun C, Hong C, Tong D, Yi-Pin F, et al. A rapid advice guideline  
445 for the diagnosis and treatment of 2019 novel coronavirus (2019-nCoV) infected pneumonia  
446 (standard version). *Mil Med Res.* 2020; 7(1): 4. Published 2020 Feb 6. doi:10.1186/s40779-  
447 020-0233-6
- 448 5. Wan S, Yi Q, Fan S, Lv J, Zhang X, Guo L, et al. Characteristics of lymphocyte subsets and  
449 cytokines in peripheral blood of 123 hospitalized patients with 2019 novel coronavirus  
450 pneumonia (NCP). medRxiv 2020.02.10.20021832; doi:  
451 <https://doi.org/10.1101/2020.02.10.20021832>
- 452 6. Qin C, Zhou L, Hu Z. Dysregulation of immune response in patients with COVID-19 in  
453 Wuhan, China. *Clin Infect Dis.* 2020; ciaa248. doi:10.1093/cid/ciaa248
- 454 7. Wang F, Nie J, Wang H, Zhao Q, Xiong Y, Deng L, et al. Characteristics of Peripheral  
455 Lymphocyte Subset Alteration in COVID-19 Pneumonia. *J Infect Dis.* 2020; 221(11): 1762-  
456 1769. doi:10.1093/infdis/jiaa150

- 457 8. Zheng M, Gao Y, Wang G, Song G, Liu S, Sun D, et al. Functional exhaustion of antiviral  
458 lymphocytes in COVID-19 patients. *Cell Mol Immunol.* 2020; 17(5): 533-535.  
459 doi:10.1038/s41423-020-0402-2
- 460 9. Spiegel M, Schneider K, Weber F, Weidmann M, Hufert FT. Interaction of Severe Acute  
461 Respiratory Syndrome-Associated Coronavirus With Dendritic Cells. *J Gen Virol.* 2006;  
462 87(Pt 7): 1953-60. doi: 10.1099/vir.0.81624-0
- 463 10. Zhang D, Guo R, Lei L, Liu H, Wang Y, Wang Y, et al. COVID-19 infection induces readily  
464 detectable morphological and inflammation-related phenotypic changes in peripheral blood  
465 monocytes, the severity of which correlate with patient outcome. medRxiv  
466 2020.03.24.20042655; doi: <https://doi.org/10.1101/2020.03.24.20042655>
- 467 11. Lombardi A, Trombetta E, Cattaneo A, Castelli V, Palomba E, Tirone M, et al. Early phases  
468 of COVID-19 are characterized by a reduction of lymphocyte populations 3 and the presence  
469 of atypical monocytes. medRxiv 2020.05.01.20087080; doi:  
470 <https://doi.org/10.1101/2020.05.01.20087080>
- 471 12. Laing AG, Lorenc A, Del Barrio ID, Das A, Fish M, Monin L, et al. A consensus Covid-19  
472 immune signature combines immuno-protection with discrete sepsis-like traits associated with  
473 poor prognosis. medRxiv 2020 doi: <https://doi.org/10.1101/2020.06.08.20125112>
- 474 13. Organization WH. Clinical management of COVID-19: interim guidance, 27 May 2020.  
475 World Health Organization; 2020 Laboratory testing strategy recommendations for COVID-  
476 19. Interim guidance. 21 March 2020. Geneva: World Health Organization, 2020.  
477 WHO/2019-nCoV/clinical/2020.5

- 478 14. Chen X, Ling J, Mo P, Zhang Y, Jiang Q, Ma Z, et al. Restoration of leukomonocyte counts is  
479 associated with viral clearance in COVID-19 hospitalized patients. medRxiv  
480 2020.03.03.20030437; doi: <https://doi.org/10.1101/2020.03.03.20030437>
- 481 15. Zheng Y, Huang Z, Ying G, Zhang X, Ye W, Hu Z, et al. Study of the lymphocyte change  
482 between COVID-19 and non-COVID-19 pneumonia cases suggesting other factors besides  
483 uncontrolled inflammation contributed to multi-organ injury. medRxiv 2020.02.19.20024885;  
484 doi: <https://doi.org/10.1101/2020.02.19.20024885>
- 485 16. Tan M, Liu Y, Zhou R, Deng X, Li F, Liang K, et al. Immunopathological characteristics of  
486 coronavirus disease 2019 cases in Guangzhou, China. Immunology. 2020;  
487 10.1111/imm.13223. doi:10.1111/imm.13223
- 488 17. Wan S, Yi Q, Fan S, Lv J, Zhang X, Guo L, et al. Relationships among lymphocyte subsets,  
489 cytokines, and the pulmonary inflammation index in coronavirus (COVID-19) infected  
490 patients. Br J Haematol. 2020; 189(3): 428-437. doi:10.1111/bjh.16659
- 491 18. Zhou Y, Fu B, Zheng X, Wang D, Zhao C. qi Y, et al. Aberrant pathogenic GM-CSF + T cells  
492 and inflammatory CD14 + CD16 + monocytes in severe pulmonary syndrome patients of a  
493 new coronavirus. bioRxiv 2020.02.12.945576; doi:  
494 <https://doi.org/10.1101/2020.02.12.945576>
- 495 19. Giamarellos-Bourboulis EJ, Netea MG, Rovina N, Akinosoglou K, Antoniadou A, Antonakos  
496 N, et al. Complex Immune Dysregulation in COVID-19 Patients with Severe Respiratory  
497 Failure. Cell Host Microbe. 2020; 27(6): 992-1000.e3. doi:10.1016/j.chom.2020.04.009
- 498 20. Yao XH, Li TY, He ZC, Ping YF, Liu HW, Yu SC, et al. A pathological report of three  
499 COVID-19 cases by minimal invasive autopsies. Zhonghua Bing Li Xue Za Zhi. 2020; 49(5):  
500 411-417. doi:10.3760/cma.j.cn112151-20200312-00193

- 501 21. Wang K, Chen W, Zhou Y-S, Lian J-Q, Zhang Z, Du P, et al. SARS-CoV-2 invades host cells  
502 via a novel route: CD147-spike protein. *bioRxiv* 2020.03.14.988345; doi:  
503 <https://doi.org/10.1101/2020.03.14.988345>
- 504 22. Koch C, Staffler G, Hüttinger R, Hilgert I, Prager E, Černý J, et al. T cell activation-  
505 associated epitopes of CD147 in regulation of the T cell response, and their definition by  
506 antibody affinity and antigen density. *Int Immunol.* 1999; 11(5): 777-786.  
507 doi:10.1093/intimm/11.5.777
- 508 23. Lucas M, Schachterle W, Oberle K, Aichele P, Diefenbach A. Dendritic cells prime natural  
509 killer cells by trans-presenting interleukin 15. *Immunity.* 2007; 26(4): 503-517.  
510 doi:10.1016/j.immuni.2007.03.006
- 511 24. Cifaldi L, Prencipe G, Caiello I, Bracaglia C, Locatelli F, De Benedetti F, et al. Inhibition of  
512 natural killer cell cytotoxicity by interleukin-6: implications for the pathogenesis of  
513 macrophage activation syndrome. *Arthritis Rheumatol.* 2015; 67(11): 3037-3046.  
514 doi:10.1002/art.39295
- 515 25. Li G, Fan Y, Lai Y, Han T, Li Z, Zhou P, et al. Coronavirus infections and immune  
516 responses. *J Med Virol.* 2020; 92(4): 424-432. doi:10.1002/jmv.25685
- 517 26. Cao W, Taylor AK, Biber RE, Davis WG, Kim JH, Reber AJ, et al. Rapid differentiation of  
518 monocytes into type I IFN-producing myeloid dendritic cells as an antiviral strategy against  
519 influenza virus infection. *J Immunol.* 2012; 189(5): 2257-2265.  
520 doi:10.4049/jimmunol.1200168
- 521 27. Spiegel M, Schneider K, Weber F, Weidmann M, Hufert FT. Interaction of severe acute  
522 respiratory syndrome-associated coronavirus with dendritic cells. *J Gen Virol.* 2006; 87(Pt 7):  
523 1953-1960. doi:10.1099/vir.0.81624-0

- 524 28. Ziegler T, Matikainen S, Rönkkö E, Österlund P, Sillanpää M, Sirén J, et al. Severe acute  
525 respiratory syndrome coronavirus fails to activate cytokine-mediated innate immune  
526 responses in cultured human monocyte-derived dendritic cells. *J Virol.* 2005; 79(21): 13800-  
527 13805. doi:10.1128/JVI.79.21.13800-13805.2005
- 528 29. Law HK, Cheung CY, Ng HY, Sia SF, Chan YO, Luk W, et al. Chemokine up-regulation in  
529 SARS-coronavirus-infected, monocyte-derived human dendritic cells. *Blood.* 2005; 106(7):  
530 2366-2374. doi:10.1182/blood-2004-10-4166
- 531 30. Lau YL, Peiris JS, Law HK. Role of dendritic cells in SARS coronavirus infection. *Hong  
532 Kong Med J.* 2012; 18 Suppl 3: 28-30.
- 533 31. Frazier WJ, Hall MW. Immunoparalysis and adverse outcomes from critical illness. *Pediatr  
534 Clin North Am.* 2008; 55(3): 647-xi. doi:10.1016/j.pcl.2008.02.009
- 535 32. Wong KL, Tai JJ, Wong WC, Han H, Sem X, Yeap WH, et al. Gene expression profiling  
536 reveals the defining features of the classical, intermediate, and nonclassical human monocyte  
537 subsets. *Blood.* 2011; 118(5): e16-e31. doi:10.1182/blood-2010-12-326355
- 538 33. Fingerle G, Pforte A, Passlick B, Blumenstein M, Ströbel M, Ziegler-Heitbrock HW. The  
539 novel subset of CD14<sup>+</sup>/CD16<sup>+</sup> blood monocytes is expanded in sepsis patients. *Blood.* 1993;  
540 82(10): 3170-3176.
- 541 34. Thieblemont N, Weiss L, Sadeghi HM, Estcourt C, Haeffner-Cavaillon N.  
542 CD14<sup>low</sup>CD16<sup>high</sup>: a cytokine-producing monocyte subset which expands during human  
543 immunodeficiency virus infection. *Eur J Immunol.* 1995; 25(12): 3418-3424.  
544 doi:10.1002/eji.1830251232

- 545 35. Zheng J, Liang H, Xu C, Xu Q, Zhang T, Shen T, et al. An unbalanced PD-L1/CD86 ratio in  
546 CD14(++)CD16(+) monocytes is correlated with HCV viremia during chronic HCV  
547 infection. *Cell Mol Immunol*. 2014; 11(3): 294-304. doi:10.1038/cmi.2013.70
- 548 36. Azeredo EL, Neves-Souza PC, Alvarenga AR, Reis SR, Torrentes-Carvalho A, Zagne SM, et  
549 al. Differential regulation of toll-like receptor-2, toll-like receptor-4, CD16 and human  
550 leucocyte antigen-DR on peripheral blood monocytes during mild and severe dengue  
551 fever. *Immunology*. 2010; 130(2): 202-216. doi:10.1111/j.1365-2567.2009.03224.x
- 552 37. Hussman JP. Cellular and Molecular Pathways of COVID-19 and Potential Points of  
553 Therapeutic Intervention. *OSF Preprints*. 2020. doi: 10.31219/osf.io/p69g8
- 554 38. Taroni JN, Greene CS, Martyanov V, Wood TA, Christmann RB, Farber HW, et al. A novel  
555 multi-network approach reveals tissue-specific cellular modulators of fibrosis in systemic  
556 sclerosis. *Genome Med*. 2017; 9(1): 27. Published 2017 Mar 23. doi:10.1186/s13073-017-  
557 0417-1
- 558 39. Spagnolo P, Balestro E, Aliberti S, Cocconcelli E, Biondini D, Della Casa G, et al. Pulmonary  
559 fibrosis secondary to COVID-19: a call to arms? *Lancet Respir Med*. 2020; S2213-  
560 2600(20)30222-8. doi:10.1016/S2213-2600(20)30222-8

561

562

## 564 **Supporting information captions**

565 **S1 Table. Haematological and serum biochemistry parameters in COVID-19 patients.** The  
566 numbers represent the means  $\pm$  standard deviations

567 **S1 Fig. Flow cytometry analysis of T cells in whole blood of COVID-19 patients.** (A-C)  
568 Smoothed histograms: CD3, CD4 and CD8 expression in patients with severe disease (red), mild  
569 disease (blue) and healthy control (green). (D, E) Overlaid contour plot: Identification of  
570 CD3<sup>+</sup>CD4<sup>+</sup> and CD3<sup>+</sup>CD8<sup>+</sup> T cells in patients with severe disease (red), mild disease (blue) and  
571 healthy control (green).

572 **S2 Fig. Monocyte gating strategy in whole blood.** (A) FS vs. SS plot: Wide selection of  
573 monocytes depending on FS/SS properties. (B) Pseudocolor CD16 vs. CD14 plot: Gating to  
574 select monocytes depending on characteristic "inverted L" shape. (C) Pseudocolor CD16 vs.  
575 HLA-DR plot: Gating to select HLA-DR<sup>+</sup> cells and to remove NK cells. (D) Pseudocolor CD14  
576 vs. HLA-DR plot: Gating to exclude B cells (HLA-DR<sup>high</sup>/CD14<sup>low</sup>). (E) Pseudocolor CD16 vs.  
577 CD14 plot: Gating to select classical (CD14<sup>high</sup>CD16<sup>-</sup>), intermediates (CD14<sup>high</sup>CD16<sup>+</sup>) and non-  
578 classical (CD14<sup>low</sup>CD16<sup>+</sup>) monocytes. (F) Zebra CD16 vs. CD14 plot: Selected monocytes  
579 redisplayed on CD16 vs. CD14 zebra plot to visualize monocyte subsets.

580 **S3 Dataset**

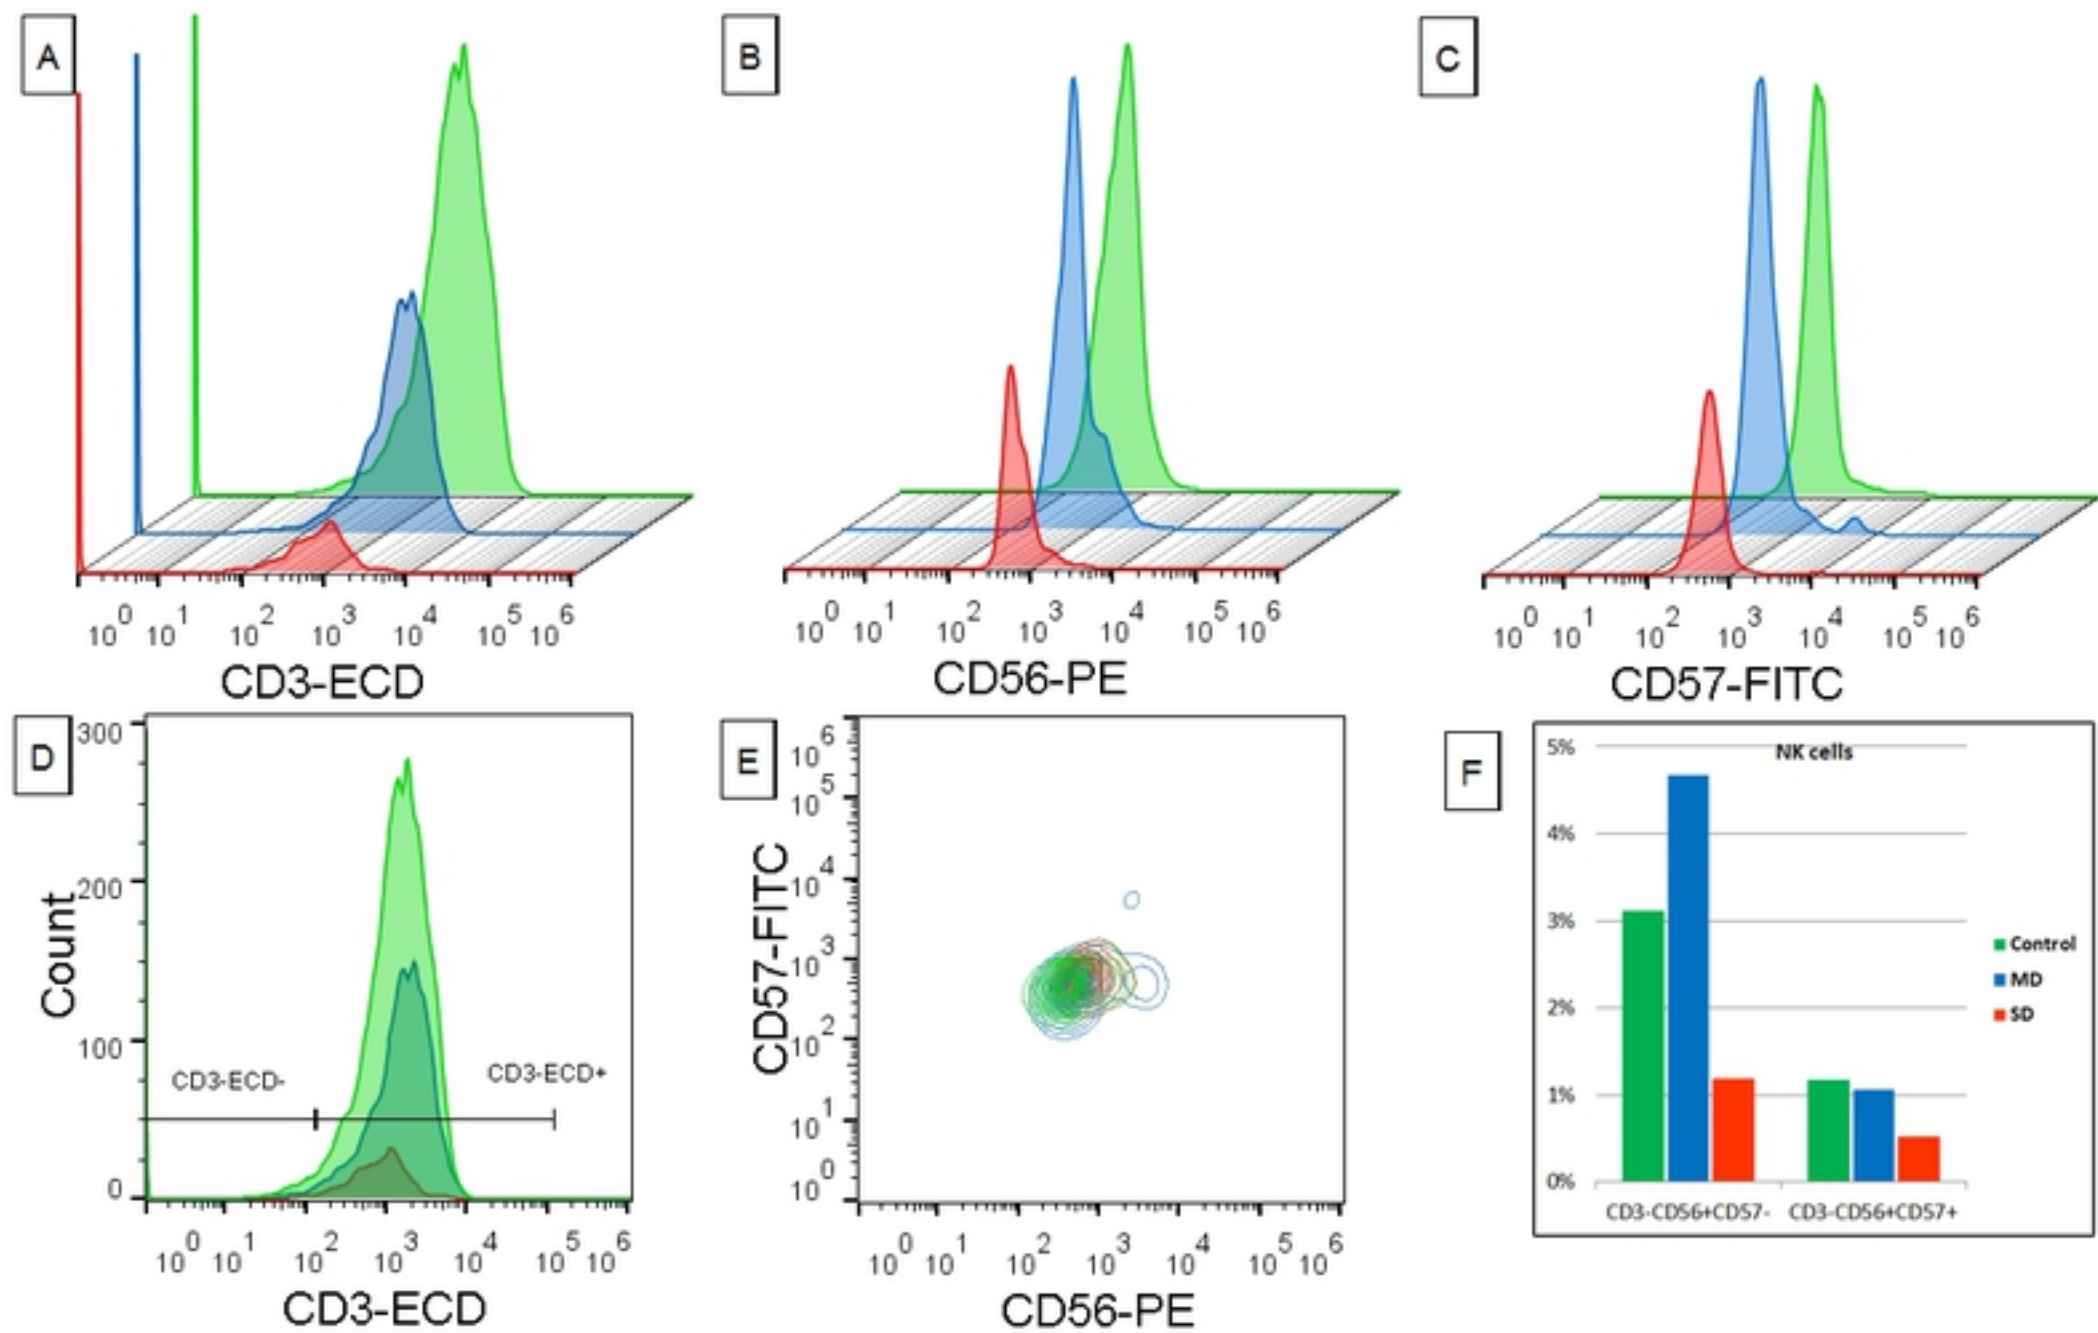

Fig 1



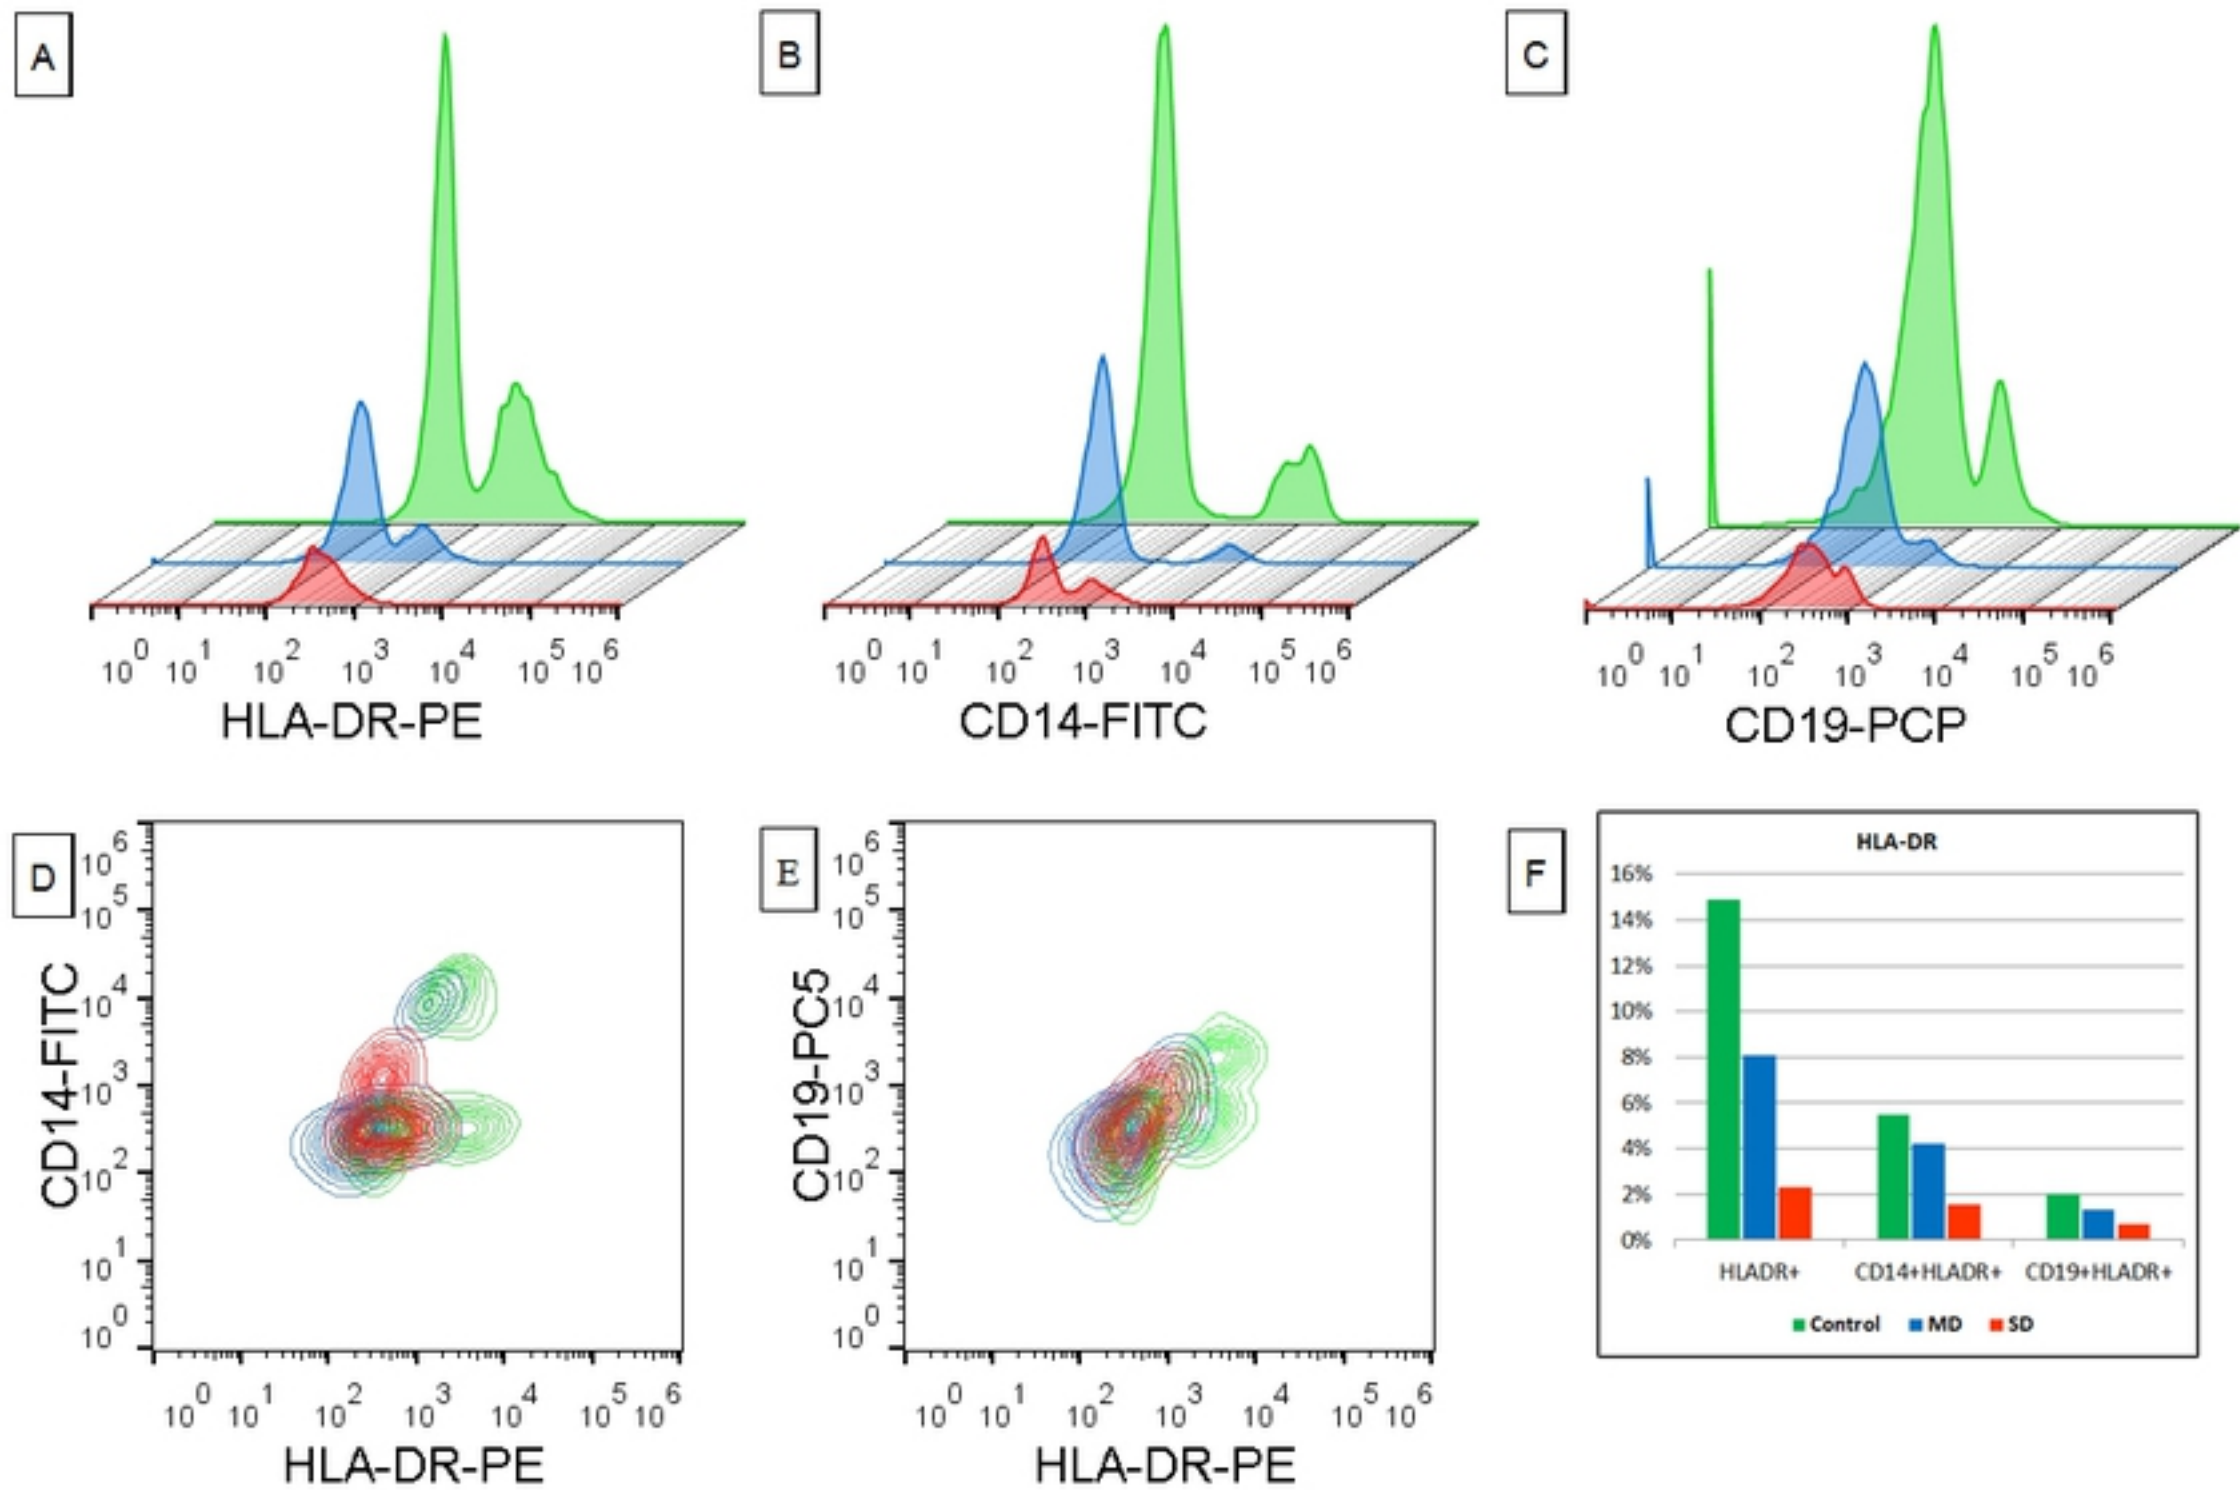

Fig 2

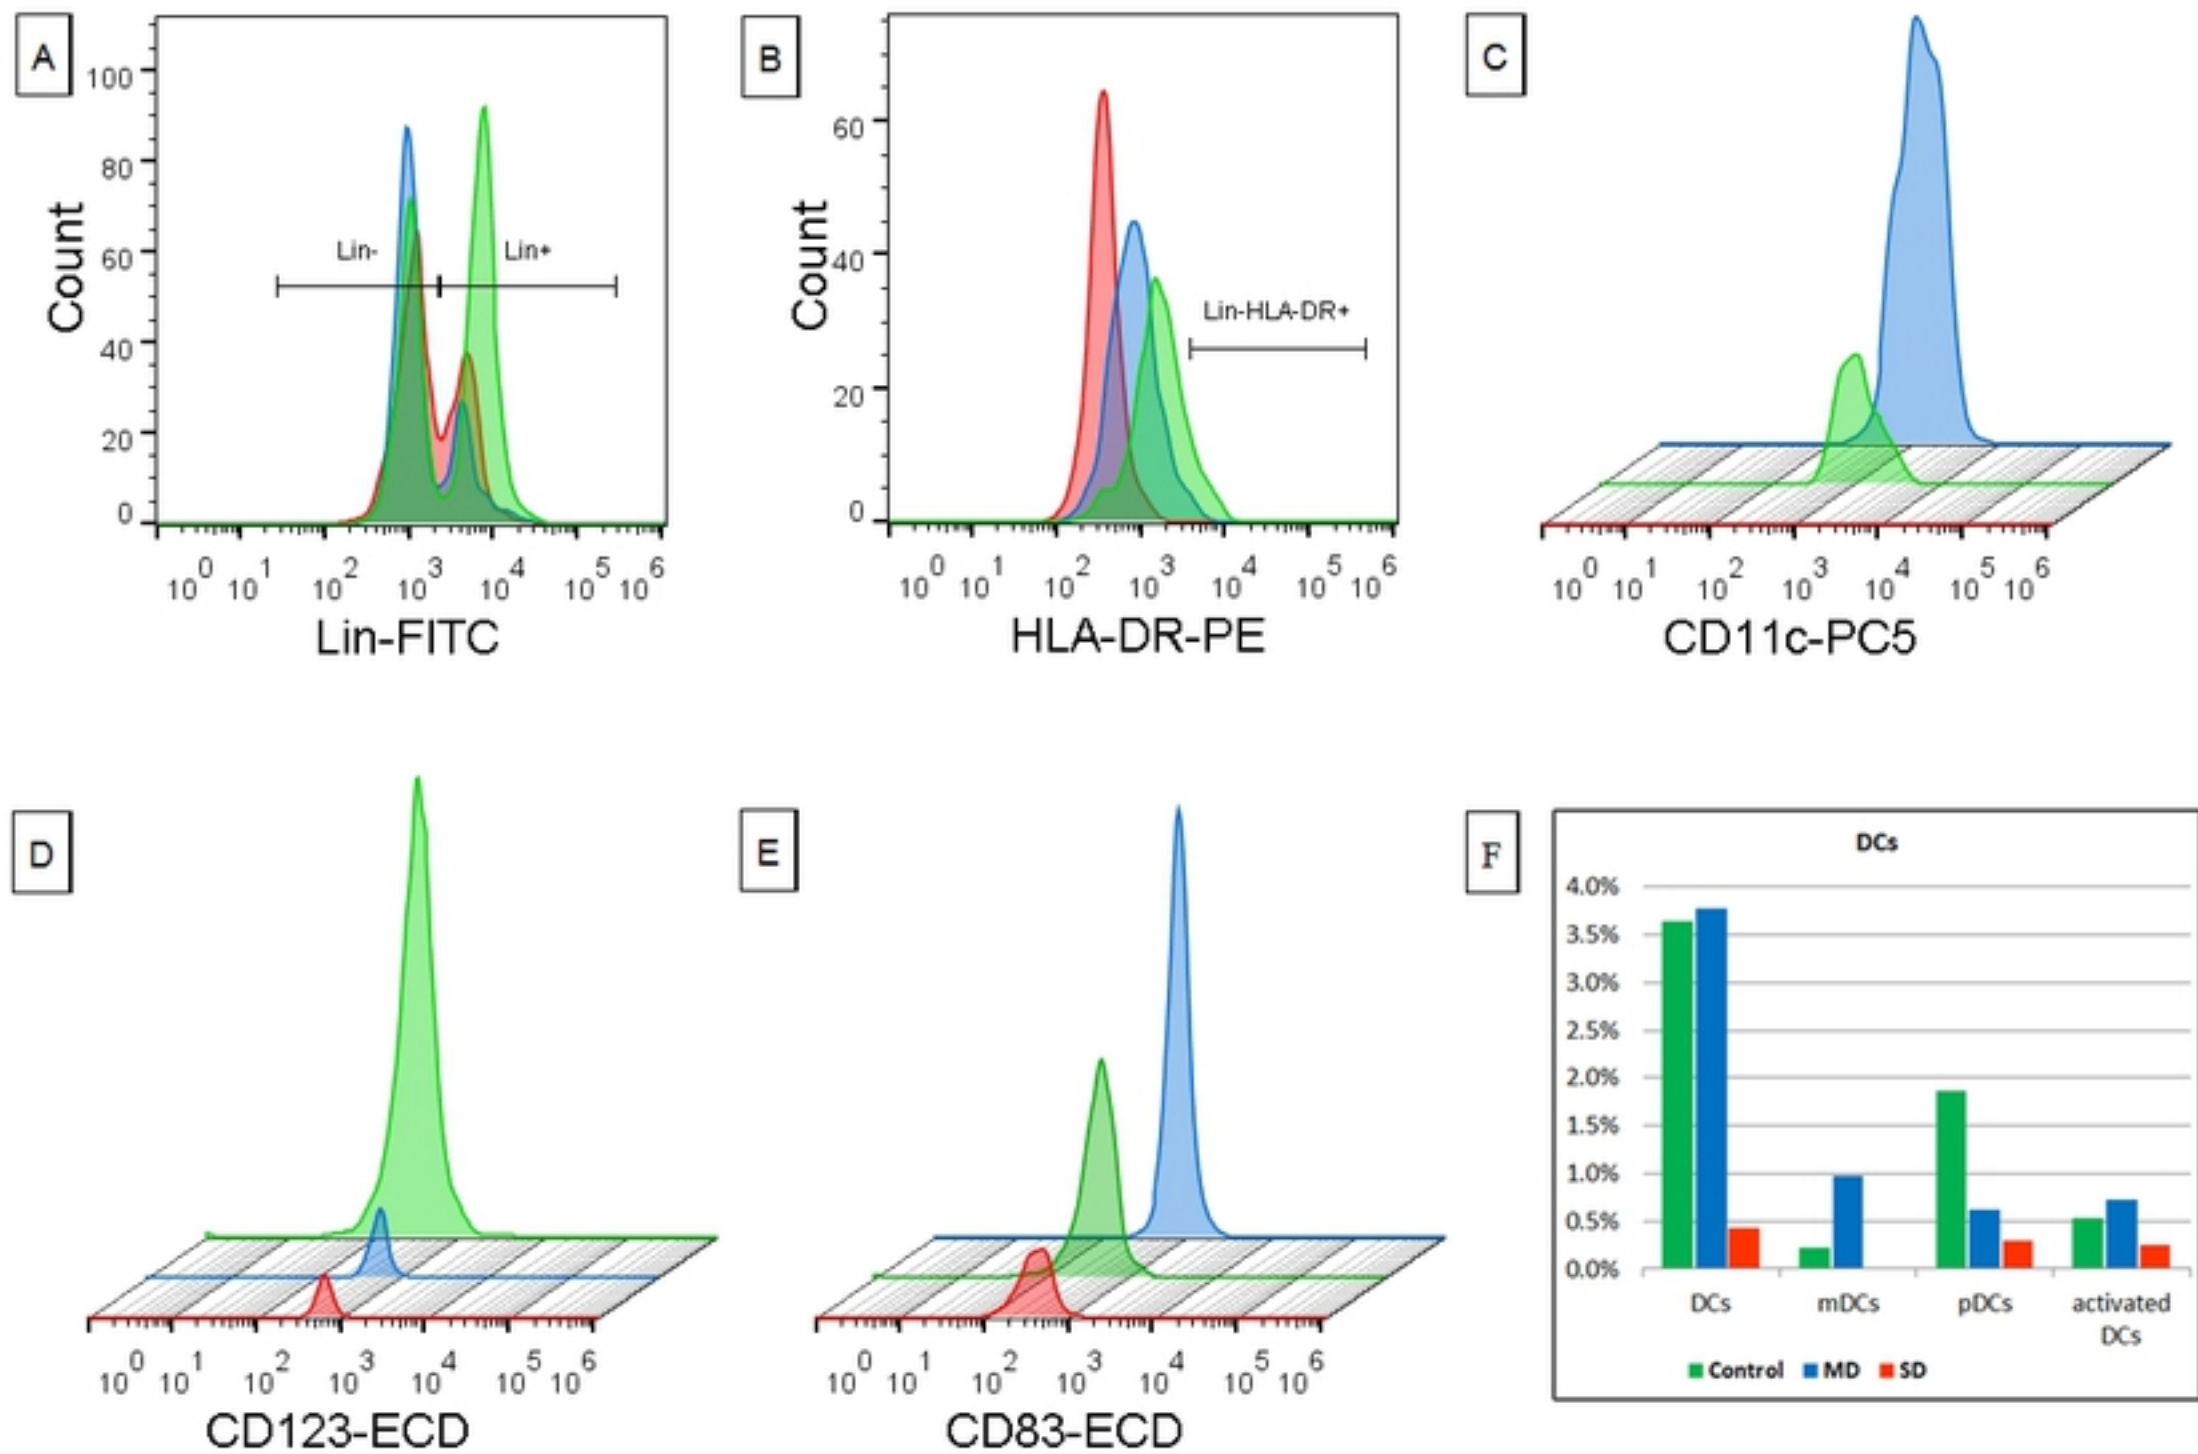

Fig 3

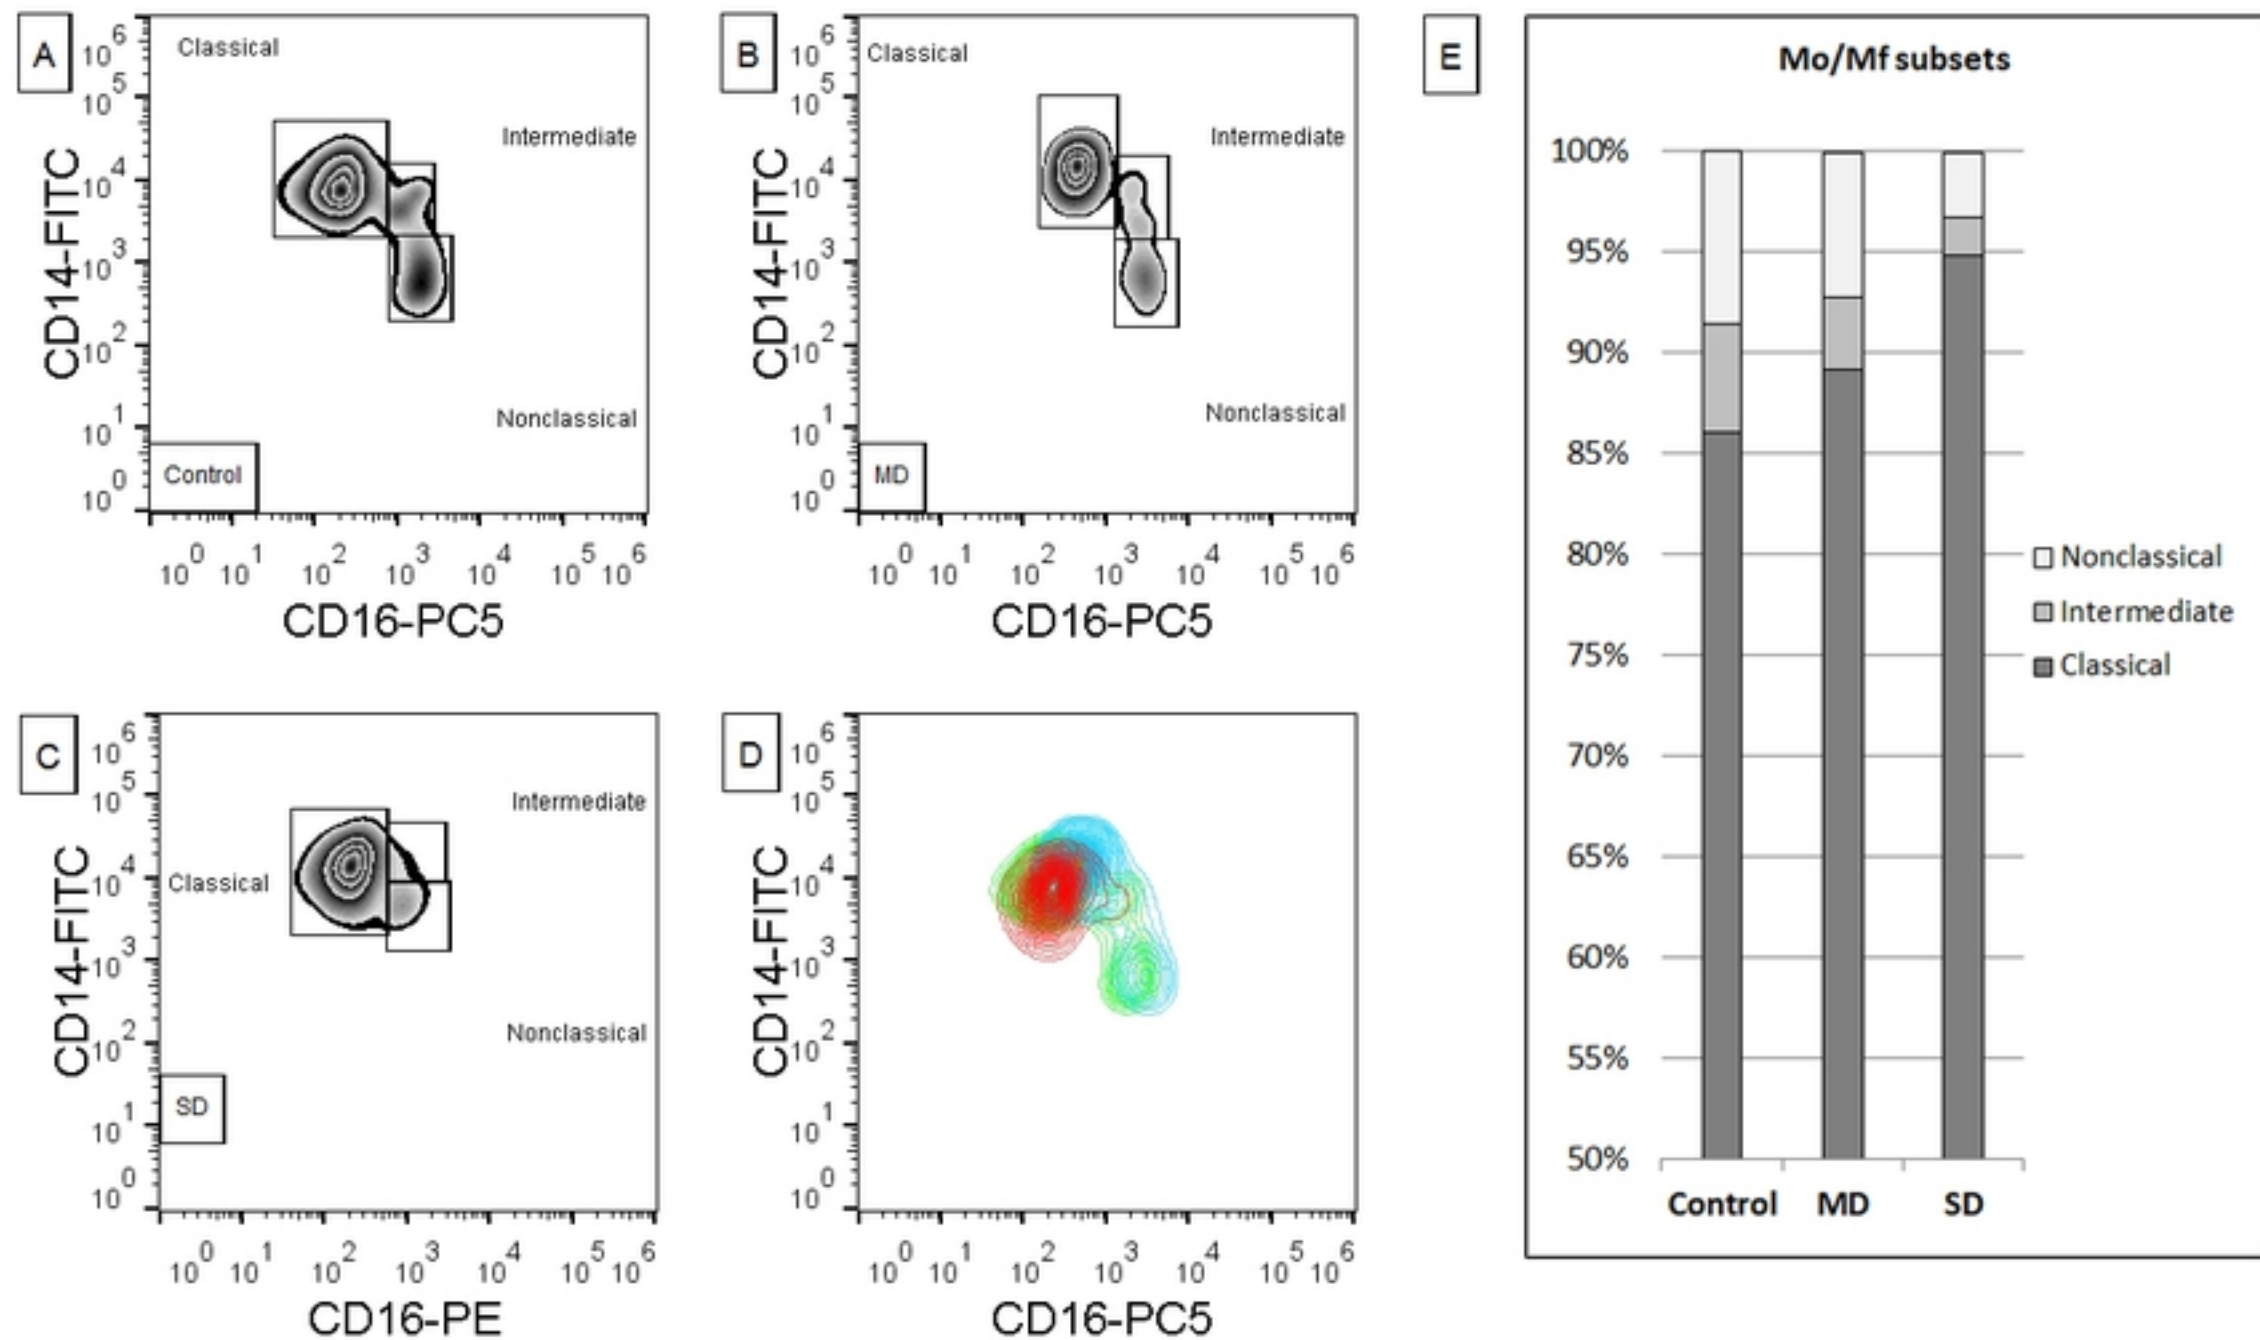

Fig 4

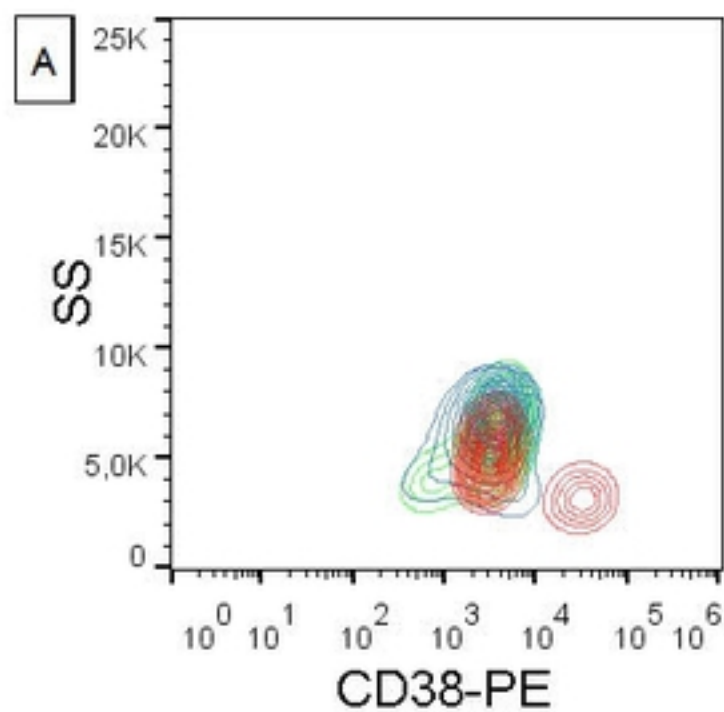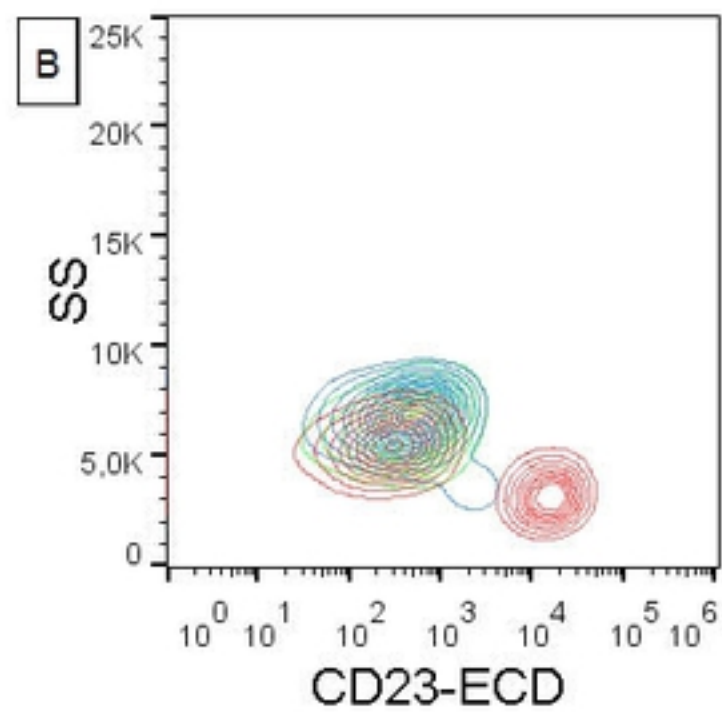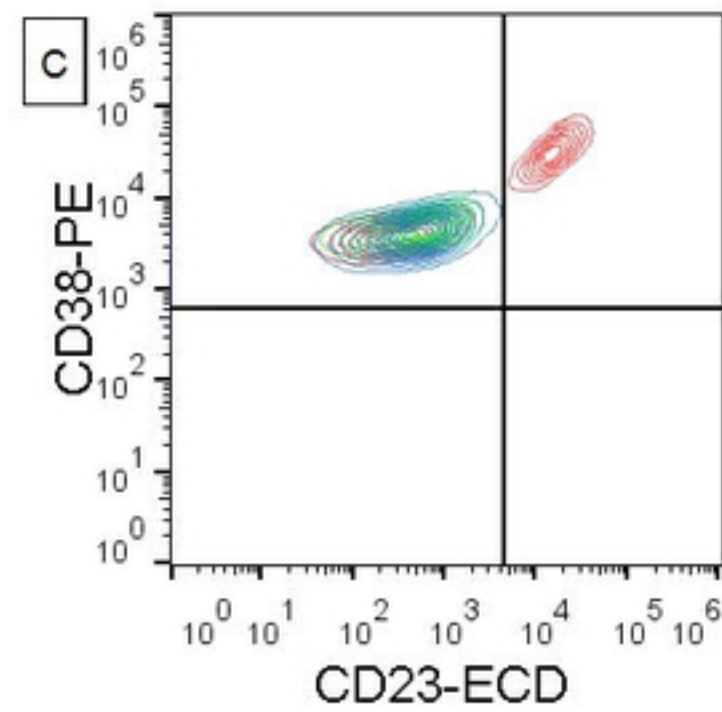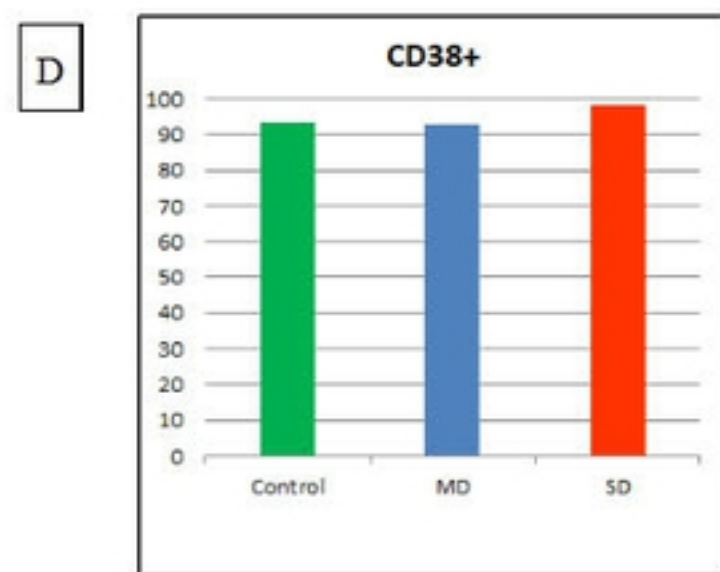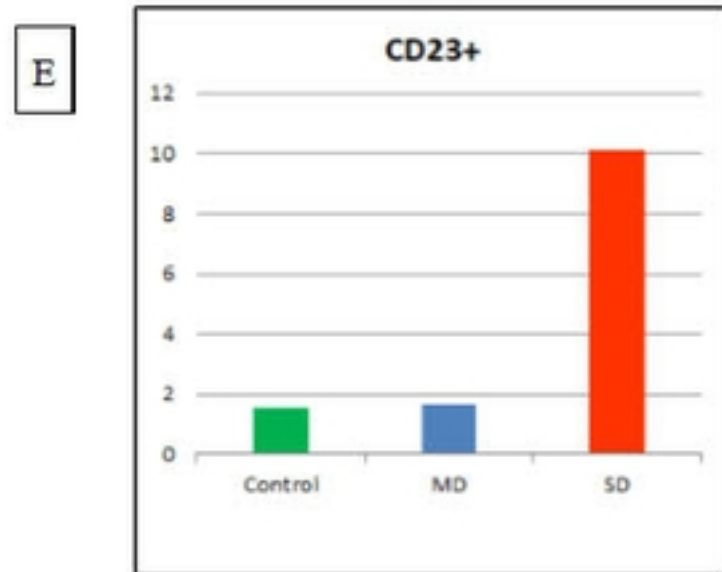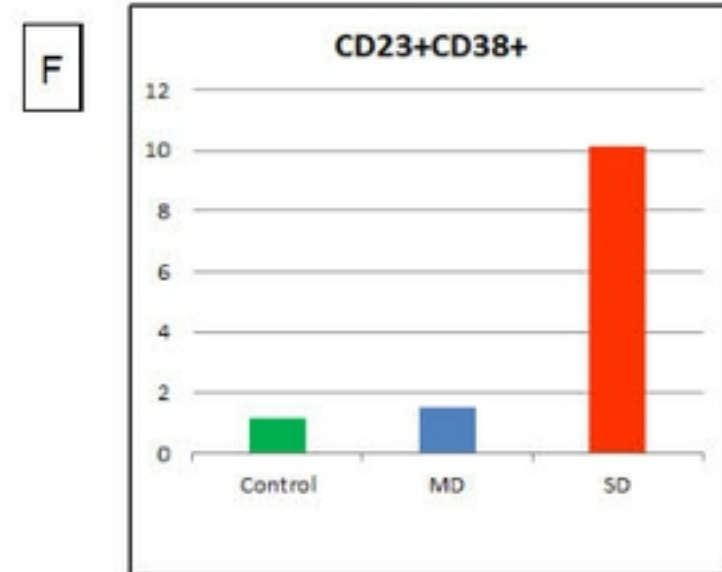

Fig 5

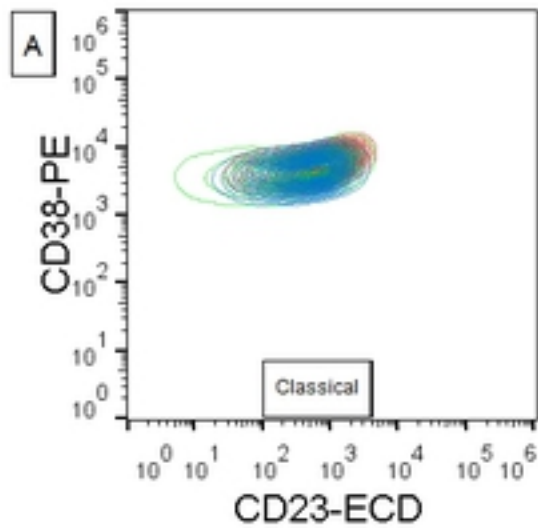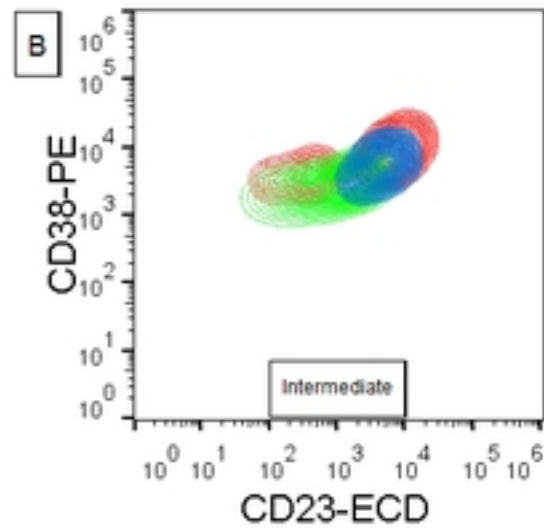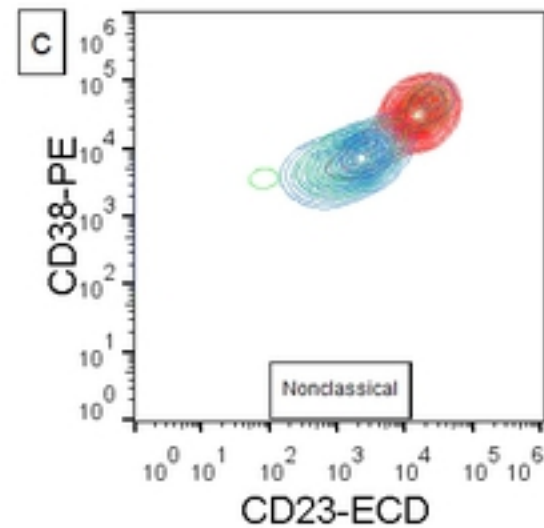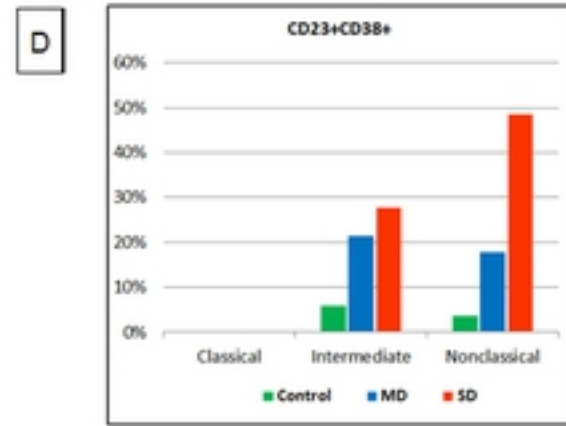

Fig 6
